# Supplementary material for: Transcriptomic Profiling of the Development of the Inflammatory Response in Human Monocytes In Vitro
Source: PLoS One. 2014 Feb 3;9(2):e87680. doi: 10.1371/journal.pone.0087680 (PMC3912012; doi:10.1371/journal.pone.0087680)
Supplement: Table S3 — Complete list of genes differentially expressed during the course of the in vitro inflammatory reaction. NA: not attributed (XLS) [file pone.0087680.s004.xls]

## Sheet: Foglio1
Table S3
Gene Cards id	Symbol	Description	Cluster	Entrez id
GC00U991001_at	MGC12488	hypothetical protein MGC12488	1	84786
GC01M000756_at	NCRNA00115	non-protein coding RNA 115	1	79854
GC01M001466_at	SSU72	SSU72 RNA polymerase II CTD phosphatase homolog (S. cerevisiae)	1	29101
GC01M012215_at	LOC390998	similar to hCG1644589	1	390998
GC01M027811_at	FGR	Gardner-Rasheed feline sarcoma viral (v-fgr) oncogene homolog	1	2268
GC01M056445_at	RPSAP20	ribosomal protein SA pseudogene 20	1	127406
GC01M071641_at	NEGR1	neuronal growth regulator 1	1	257194
GC01M085428_at	C1orf52	chromosome 1 open reading frame 52	1	148423
GC01M119286_at	WARS2	tryptophanyl tRNA synthetase 2, mitochondrial	1	10352
GC01M148167_at	MTMR11	myotubularin related protein 11	1	10903
GC01M148813_at	MCL1	myeloid cell leukemia sequence 1 (BCL2-related)	1	4170
GC01M151612_at	S100A12	S100 calcium binding protein A12	1	6283
GC01M152395_at	TPM3	tropomyosin 3	1	7170
GC01M158110_at	CCDC19	coiled-coil domain containing 19	1	25790
GC01M159066_at	CD244	CD244 molecule, natural killer cell receptor 2B4	1	51744
GC01M167699_at	SLC19A2	solute carrier family 19 (thiamine transporter), member 2	1	10560
GC01M167750_at	F5	coagulation factor V (proaccelerin, labile factor)	1	2153
GC01M172157_at	GAS5	growth arrest-specific 5 (non-protein coding)	1	60674
GC01M227795_at	TAF5L	TAF5-like RNA polymerase II, p300/CBP-associated factor (PCAF)-associated factor, 65kDa	1	27097
GC01M239882_at	CHML	choroideremia-like (Rab escort protein 2)	1	1122
GC01M245069_at	AHCTF1	AT hook containing transcription factor 1	1	25909
GC01P001543_at	LOC100128968	hypothetical protein LOC100128968	1	100128968
GC01P022235_at	CDC42	cell division cycle 42 (GTP binding protein, 25kDa)	1	998
GC01P026361_at	ZNF593	zinc finger protein 593	1	51042
GC01P027195_at	TRNP1	TMF1-regulated nuclear protein 1	1	388610
GC01P042920_at	YBX1	Y box binding protein 1	1	4904
GC01P052642_at	PRPF38A	PRP38 pre-mRNA processing factor 38 (yeast) domain containing A	1	84950
GC01P052840_at	GPX7	glutathione peroxidase 7	1	2882
GC01P075963_at	RABGGTB	Rab geranylgeranyltransferase, beta subunit	1	5876
GC01P096899_at	PTBP2	polypyrimidine tract binding protein 2	1	58155
GC01P153797_at	LOC645676	hypothetical LOC645676	1	645676
GC01P156526_at	CD1C	CD1c molecule	1	911
GC01P170039_at	ENSG00000213060	NA	1	NA
GC01P207915_at	G0S2	G0/G1switch 2	1	50486
GC01P218929_at	C1orf115	chromosome 1 open reading frame 115	1	79762
GC01P245648_at	NLRP3	NLR family, pyrin domain containing 3	1	114548
GC02M000660_at	TMEM18	transmembrane protein 18	1	129787
GC02M016653_at	FAM49A	family with sequence similarity 49, member A	1	81553
GC02M099627_at	AFF3	AF4/FMR2 family, member 3	1	3899
GC02M131524_at	FAM168B	family with sequence similarity 168, member B	1	130074
GC02M156889_at	NR4A2	nuclear receptor subfamily 4, group A, member 2	1	4929
GC02M157982_at	CYTIP	cytohesin 1 interacting protein	1	9595
GC02M166311_at	GALNT3	UDP-N-acetyl-alpha-D-galactosamine:polypeptide N-acetylgalactosaminyltransferase 3 (GalNAc-T3)	1	2591
GC02M192407_at	SDPR	serum deprivation response (phosphatidylserine binding protein)	1	8436
GC02M207653_at	KLF7	Kruppel-like factor 7 (ubiquitous)	1	8609
GC02M232027_at	NCL	nucleolin	1	4691
GC02M240548_at	NDUFA10	NADH dehydrogenase (ubiquinone) 1 alpha subcomplex, 10, 42kDa	1	4705
GC02P008772_at	ID2	inhibitor of DNA binding 2, dominant negative helix-loop-helix protein	1	3398
GC02P028527_at	FOSL2	FOS-like antigen 2	1	2355
GC02P028572_at	PLB1	phospholipase B1	1	151056
GC02P028946_at	WDR43	WD repeat domain 43	1	23160
GC02P029032_at	FAM179A	family with sequence similarity 179, member A	1	165186
GC02P045790_at	PRKCE	protein kinase C, epsilon	1	5581
GC02P054596_at	SPTBN1	spectrin, beta, non-erythrocytic 1	1	6711
GC02P069995_at	MXD1	MAX dimerization protein 1	1	4084
GC02P101077_at	RPL31	ribosomal protein L31	1	6160
GC02P118288_at	DDX18	DEAD (Asp-Glu-Ala-Asp) box polypeptide 18	1	8886
GC02P173129_at	PDK1	pyruvate dehydrogenase kinase, isozyme 1	1	5163
GC02P177786_at	HNRNPA3	heterogeneous nuclear ribonucleoprotein A3	1	220988
GC02P190014_at	WDR75	WD repeat domain 75	1	84128
GC02P202839_at	NOP58	NOP58 ribonucleoprotein homolog (yeast)	1	51602
GC02P241658_at	SNED1	sushi, nidogen and EGF-like domains 1	1	25992
GC02U900852_at	FLJ46875	hypothetical LOC440918	1	440918
GC03M039159_at	CSRNP1	cysteine-serine-rich nuclear protein 1	1	64651
GC03M047244_at	KIF9	kinesin family member 9	1	64147
GC03M071088_at	FOXP1	forkhead box P1	1	27086
GC03M071903_at	PROK2	prokineticin 2	1	60675
GC03M127640_at	ZXDC	ZXD family zinc finger C	1	79364
GC03M135358_at	RYK	RYK receptor-like tyrosine kinase	1	6259
GC03M151742_at	SERP1	stress-associated endoplasmic reticulum protein 1	1	27230
GC03M158348_at	CCNL1	cyclin L1	1	57018
GC03M172067_at	RPL22L1	ribosomal protein L22-like 1	1	200916
GC03P010134_at	C3orf10	chromosome 3 open reading frame 10	1	55845
GC03P023822_at	UBE2E1	ubiquitin-conjugating enzyme E2E 1 (UBC4/5 homolog, yeast)	1	7324
GC03P052296_at	GLYCTK	glycerate kinase	1	132158
GC03P101020_at	C3orf26	chromosome 3 open reading frame 26	1	84319
GC03P134776_at	CDV3	CDV3 homolog (mouse)	1	55573
GC03P151609_at	TSC22D2	TSC22 domain family, member 2	1	9819
GC03P197955_at	PAK2	p21 protein (Cdc42/Rac)-activated kinase 2	1	5062
GC03P199165_at	RPL35A	ribosomal protein L35a	1	6165
GC04M001150_at	SPON2	spondin 2, extracellular matrix protein	1	10417
GC04M007179_at	GRPEL1	GrpE-like 1, mitochondrial (E. coli)	1	80273
GC04M039501_at	PDS5A	PDS5, regulator of cohesion maintenance, homolog A (S. cerevisiae)	1	23244
GC04M057592_at	IGFBP7	insulin-like growth factor binding protein 7	1	3490
GC04M068858_at	YTHDC1	YTH domain containing 1	1	91746
GC04M075086_at	PF4	platelet factor 4	1	5196
GC04M082567_at	RASGEF1B	RasGEF domain family, member 1B	1	153020
GC04M089836_at	NAP1L5	nucleosome assembly protein 1-like 5	1	266812
GC04M103936_at	UBE2D3	ubiquitin-conjugating enzyme E2D 3 (UBC4/5 homolog, yeast)	1	7323
GC04M153461_at	FBXW7	F-box and WD repeat domain containing 7	1	55294
GC04P006812_at	S100P	S100 calcium binding protein P	1	6286
GC04P014681_at	CPEB2	cytoplasmic polyadenylation element binding protein 2	1	132864
GC04P099881_at	ENSG00000174991	NA	1	NA
GC04P119420_at	SNHG8	small nucleolar RNA host gene 8 (non-protein coding)	1	100093630
GC04P140156_at	CCRN4L	CCR4 carbon catabolite repression 4-like (S. cerevisiae)	1	25819
GC04P140442_at	NARG1	NMDA receptor regulated 1	1	80155
GC04P142361_at	ZNF330	zinc finger protein 330	1	27309
GC04P146238_at	ABCE1	ATP-binding cassette, sub-family E (OABP), member 1	1	6059
GC04U900024_at	KIAA0114	KIAA0114	1	57291
GC05M000916_at	BRD9	bromodomain containing 9	1	65980
GC05M057785_at	PLK2	polo-like kinase 2 (Drosophila)	1	10769
GC05M061721_at	DIMT1L	DIM1 dimethyladenosine transferase 1-like (S. cerevisiae)	1	27292
GC05M081607_at	RPS23	ribosomal protein S23	1	6228
GC05M086725_at	CCNH	cyclin H	1	902
GC05M098219_at	CHD1	chromodomain helicase DNA binding protein 1	1	1105
GC05M137114_at	HNRNPA0	heterogeneous nuclear ribonucleoprotein A0	1	10949
GC05M137920_at	HSPA9	heat shock 70kDa protein 9 (mortalin)	1	3313
GC05M145473_at	LARS	leucyl-tRNA synthetase	1	51520
GC05M172127_at	DUSP1	dual specificity phosphatase 1	1	1843
GC05M176761_at	F12	coagulation factor XII (Hageman factor)	1	2161
GC05M178974_at	HNRNPH1	heterogeneous nuclear ribonucleoprotein H1 (H)	1	3187
GC05P032622_at	SUB1	SUB1 homolog (S. cerevisiae)	1	10923
GC05P057825_at	GAPT	GRB2-binding adaptor protein, transmembrane	1	202309
GC05P060279_at	NDUFAF2	NADH dehydrogenase (ubiquinone) 1 alpha subcomplex, assembly factor 2	1	91942
GC05P065475_at	SFRS12	splicing factor, arginine/serine-rich 12	1	140890
GC05P072830_at	BTF3	basic transcription factor 3	1	689
GC05P082804_at	VCAN	versican	1	1462
GC05P137829_at	EGR1	early growth response 1	1	1958
GC05P140060_at	ZMAT2	zinc finger, matrin type 2	1	153527
GC05P141283_at	KIAA0141	KIAA0141	1	9812
GC05P145807_at	TCERG1	transcription elongation regulator 1	1	10915
GC05P150381_at	GPX3	glutathione peroxidase 3 (plasma)	1	2878
GC05P157090_at	THG1L	tRNA-histidine guanylyltransferase 1-like (S. cerevisiae)	1	54974
GC05P170746_at	NPM1	nucleophosmin (nucleolar phosphoprotein B23, numatrin)	1	4869
GC05U900422_at	LOC153546	hypothetical protein LOC153546	1	153546
GC06M004942_at	RPP40	ribonuclease P/MRP 40kDa subunit	1	10799
GC06M005049_at	LYRM4	LYR motif containing 4	1	57128
GC06M011291_at	NEDD9	neural precursor cell expressed, developmentally down-regulated 9	1	4739
GC06M017871_at	KIF13A	kinesin family member 13A	1	63971
GC06M031605_at	BAT1	HLA-B associated transcript 1	1	7919
GC06M032260_at	PBX2	pre-B-cell leukemia homeobox 2	1	5089
GC06M050934_at	RPS17P5	ribosomal protein S17 pseudogene 5	1	442216
GC06M074282_at	EEF1A1	eukaryotic translation elongation factor 1 alpha 1	1	1915
GC06M086377_at	SYNCRIP	synaptotagmin binding, cytoplasmic RNA interacting protein	1	10492
GC06M086854_at	RPL7P27	ribosomal protein L7 pseudogene 27	1	643906
GC06P007335_at	RIOK1	RIO kinase 1 (yeast)	1	83732
GC06P012827_at	PHACTR1	phosphatase and actin regulator 1	1	221692
GC06P015354_at	JARID2	jumonji, AT rich interactive domain 2	1	3720
GC06P025373_at	RPL21P68	ribosomal protein L21 pseudogene 68	1	645452
GC06P027289_at	RPL10P2	ribosomal protein L10 pseudogene 2	1	442171
GC06P028043_at	RPLP2P1	ribosomal protein, large P2, pseudogene 1	1	442175
GC06P043846_at	VEGFA	vascular endothelial growth factor A	1	7422
GC06P054596_at	RPSAP44	ribosomal protein SA pseudogene 44	1	652411
GC06P064340_at	PTP4A1	protein tyrosine phosphatase type IVA, member 1	1	7803
GC06P076367_at	SENP6	SUMO1/sentrin specific peptidase 6	1	26054
GC06P127046_at	RPS4P9	ribosomal protein S4X pseudogene 9	1	442257
GC06P139497_at	HECA	headcase homolog (Drosophila)	1	51696
GC06P155147_at	RBM16	RNA binding motif protein 16	1	22828
GC07M019701_at	TWISTNB	TWIST neighbor	1	221830
GC07M027147_at	HOXA5	homeobox A5	1	3202
GC07M140080_at	BRAF	v-raf murine sarcoma viral oncogene homolog B1	1	673
GC07M151462_at	MLL3	myeloid/lymphoid or mixed-lineage leukemia 3	1	58508
GC07P016652_at	BZW2	basic leucine zipper and W2 domains 2	1	28969
GC07P030141_at	C7orf41	chromosome 7 open reading frame 41	1	222166
GC07P043280_at	ENSG00000213717	NA	1	NA
GC07P071048_at	RPS28P6	ribosomal protein S28 pseudogene 6	1	728453
GC07P101247_at	CUX1	cut-like homeobox 1	1	1523
GC07P120378_at	ING3	inhibitor of growth family, member 3	1	54556
GC07P151784_at	LOC100128822	hypothetical LOC100128822	1	100128822
GC07P155039_at	RBM33	RNA binding motif protein 33	1	155435
GC07U900769_at	FLJ43663	hypothetical LOC378805	1	378805
GC08M000605_at	ERICH1	glutamate-rich 1	1	157697
GC08M022601_at	EGR3	early growth response 3	1	1960
GC08M099126_at	SNORA72	small nucleolar RNA, H/ACA box 72	1	26775
GC08M103731_at	KLF10	Kruppel-like factor 10	1	7071
GC08M144971_at	PUF60	poly-U binding splicing factor 60KDa	1	22827
GC08P036865_at	FKSG2	apoptosis inhibitor	1	59347
GC08P042871_at	HOOK3	hook homolog 3 (Drosophila)	1	84376
GC08P118603_at	MED30	mediator complex subunit 30	1	90390
GC09M003214_at	RFX3	regulatory factor X, 3 (influences HLA class II expression)	1	5991
GC09M033039_at	SMU1	smu-1 suppressor of mec-8 and unc-52 homolog (C. elegans)	1	55234
GC09M033245_at	BAG1	BCL2-associated athanogene	1	573
GC09M093211_at	NFIL3	nuclear factor, interleukin 3 regulated	1	4783
GC09M113842_at	SUSD1	sushi domain containing 1	1	64420
GC09M139461_at	NELF	nasal embryonic LHRH factor	1	26012
GC09P033807_at	UBE2R2	ubiquitin-conjugating enzyme E2R 2	1	54926
GC09P035821_at	C9orf127	chromosome 9 open reading frame 127	1	51754
GC09P081376_at	TLE4	transducin-like enhancer of split 4 (E(sp1) homolog, Drosophila)	1	7091
GC09P090795_at	C9orf47	chromosome 9 open reading frame 47	1	286223
GC09P090797_at	S1PR3	sphingosine-1-phosphate receptor 3	1	1903
GC09P094611_at	ANKRD19	ankyrin repeat domain 19	1	138649
GC09P101623_at	NR4A3	nuclear receptor subfamily 4, group A, member 3	1	8013
GC09P127549_at	PBX3	pre-B-cell leukemia homeobox 3	1	5090
GC09P128607_at	ZBTB43	zinc finger and BTB domain containing 43	1	23099
GC09P130258_at	ODF2	outer dense fiber of sperm tails 2	1	4957
GC0XM047368_at	CFP	complement factor properdin	1	5199
GC0XM047396_at	UXT	ubiquitously-expressed transcript	1	8409
GC0XM053237_at	KDM5C	lysine (K)-specific demethylase 5C	1	8242
GC0XM070241_at	CXorf65	chromosome X open reading frame 65	1	158830
GC0XM081650_at	RPL22P22	ribosomal protein L22 pseudogene 22	1	100130922
GC0XM134872_at	MMGT1	membrane magnesium transporter 1	1	93380
GC0XM135783_at	RBMX	RNA binding motif protein, X-linked	1	27316
GC0XP000132_at	PLCXD1	phosphatidylinositol-specific phospholipase C, X domain containing 1	1	55344
GC0XP002546_at	LOC401577	hypothetical protein LOC401577	1	401577
GC0XP016647_at	SYAP1	synapse associated protein 1, SAP47 homolog (Drosophila)	1	94056
GC0XP046289_at	LOC401588	hypothetical LOC401588	1	401588
GC0XP048317_at	RBM3	RNA binding motif (RNP1, RRM) protein 3	1	5935
GC0XP054573_at	GNL3L	guanine nucleotide binding protein-like 3 (nucleolar)-like	1	54552
GC0XP064804_at	MSN	moesin	1	4478
GC0XP095337_at	ENSG00000218262	NA	1	NA
GC0XP110748_at	ENSG00000185389	NA	1	NA
GC0XP152583_at	ENSG00000216566	NA	1	NA
GC10M022866_at	PIP4K2A	phosphatidylinositol-5-phosphate 4-kinase, type II, alpha	1	5305
GC10M038408_at	LOC340947	similar to eukaryotic translation initiation factor 3, subunit 6 interacting protein	1	340947
GC10M064597_at	JMJD1C	jumonji domain containing 1C	1	221037
GC10M076827_at	ZNF503	zinc finger protein 503	1	84858
GC10M096987_at	PDLIM1	PDZ and LIM domain 1	1	9124
GC10M119033_at	PDZD8	PDZ domain containing 8	1	118987
GC10M126075_at	OAT	ornithine aminotransferase (gyrate atrophy)	1	4942
GC10P017310_at	VIM	vimentin	1	7431
GC10P020145_at	PLXDC2	plexin domain containing 2	1	84898
GC10P023768_at	OTUD1	OTU domain containing 1	1	220213
GC10P028861_at	WAC	WW domain containing adaptor with coiled-coil	1	51322
GC10P069762_at	HNRNPH3	heterogeneous nuclear ribonucleoprotein H3 (2H9)	1	3189
GC10P070331_at	DDX50	DEAD (Asp-Glu-Ala-Asp) box polypeptide 50	1	79009
GC10P070385_at	DDX21	DEAD (Asp-Glu-Ala-Asp) box polypeptide 21	1	9188
GC10P093673_at	BTAF1	BTAF1 RNA polymerase II, B-TFIID transcription factor-associated, 170kDa (Mot1 homolog, S. cerevisiae)	1	9044
GC10P104608_at	C10orf32	chromosome 10 open reading frame 32	1	119032
GC10P134201_at	INPP5A	inositol polyphosphate-5-phosphatase, 40kDa	1	3632
GC10P134941_at	VENTX	VENT homeobox homolog (Xenopus laevis)	1	27287
GC11M062201_at	UBXN1	UBX domain protein 1	1	51035
GC11M062357_at	WDR74	WD repeat domain 74	1	54663
GC11M064644_at	FAU	Finkel-Biskis-Reilly murine sarcoma virus (FBR-MuSV) ubiquitously expressed	1	2197
GC11M065116_at	KCNK7	potassium channel, subfamily K, member 7	1	10089
GC11M077603_at	GAB2	GRB2-associated binding protein 2	1	9846
GC11M095142_at	FAM76B	family with sequence similarity 76, member B	1	143684
GC11M101773_at	TMEM123	transmembrane protein 123	1	114908
GC11P000300_at	IFITM2	interferon induced transmembrane protein 2 (1-8D)	1	10581
GC11P000799_at	RPLP2	ribosomal protein, large, P2	1	6181
GC11P002378_at	TSSC4	tumor suppressing subtransferable candidate 4	1	10078
GC11P071605_at	FOLR2	folate receptor 2 (fetal)	1	2350
GC11P108041_at	DDX10	DEAD (Asp-Glu-Ala-Asp) box polypeptide 10	1	1662
GC11P111602_at	PTS	6-pyruvoyltetrahydropterin synthase	1	5805
GC11P123997_at	TBRG1	transforming growth factor beta regulator 1	1	84897
GC11U901216_at	LOC399900	hypothetical LOC399900	1	399900
GC11U901243_at	NCRNA00084	non-protein coding RNA 84	1	283131
GC12M007963_at	SLC2A3	solute carrier family 2 (facilitated glucose transporter), member 3	1	6515
GC12M009796_at	CD69	CD69 molecule	1	969
GC12M010742_at	CSDA	cold shock domain protein A	1	8531
GC12M044405_at	LOC400027	hypothetical protein LOC400027	1	400027
GC12M074726_at	NAP1L1	nucleosome assembly protein 1-like 1	1	4673
GC12M079693_at	LIN7A	lin-7 homolog A (C. elegans)	1	8825
GC12M081270_at	CCDC59	coiled-coil domain containing 59	1	29080
GC12M091039_at	BTG1	B-cell translocation gene 1, anti-proliferative	1	694
GC12M098954_at	UHRF1BP1L	UHRF1 binding protein 1-like	1	23074
GC12M105134_at	CKAP4	cytoskeleton-associated protein 4	1	10970
GC12M114880_at	MED13L	mediator complex subunit 13-like	1	23389
GC12M121875_at	VPS37B	vacuolar protein sorting 37 homolog B (S. cerevisiae)	1	79720
GC12M122466_at	RILPL2	Rab interacting lysosomal protein-like 2	1	196383
GC12P010016_at	CLEC12A	C-type lectin domain family 12, member A	1	160364
GC12P010256_at	GABARAPL1	GABA(A) receptor-associated protein like 1	1	23710
GC12P012857_at	DDX47	DEAD (Asp-Glu-Ala-Asp) box polypeptide 47	1	51202
GC12P050717_at	NR4A1	nuclear receptor subfamily 4, group A, member 1	1	3164
GC12P051979_at	C12orf10	chromosome 12 open reading frame 10	1	60314
GC12P060940_at	USP15	ubiquitin specific peptidase 15	1	9958
GC12P088603_at	LOC338758	hypothetical protein LOC338758	1	338758
GC12P105200_at	TCP11L2	t-complex 11 (mouse)-like 2	1	255394
GC12P130761_at	SFRS8	splicing factor, arginine/serine-rich 8 (suppressor-of-white-apricot homolog, Drosophila)	1	6433
GC13M029236_at	UBL3	ubiquitin-like 3	1	5412
GC13M044411_at	NUFIP1	nuclear fragile X mental retardation protein interacting protein 1	1	26747
GC13M044830_at	TPT1	tumor protein, translationally-controlled 1	1	7178
GC13M048446_at	LOC647131	hypothetical LOC647131	1	647131
GC13M098704_at	GPR18	G protein-coupled receptor 18	1	2841
GC13M098745_at	GPR183	G protein-coupled receptor 183	1	1880
GC13M113159_at	DCUN1D2	DCN1, defective in cullin neddylation 1, domain containing 2 (S. cerevisiae)	1	55208
GC13P040932_at	C13orf15	chromosome 13 open reading frame 15	1	28984
GC14M046189_at	RPL10L	ribosomal protein L10-like	1	140801
GC14M049645_at	C14orf138	chromosome 14 open reading frame 138	1	79609
GC14M053963_at	CNIH	cornichon homolog (Drosophila)	1	10175
GC14M057801_at	FLJ31306	hypothetical protein FLJ31306	1	379025
GC14M068332_at	C14orf181	chromosome 14 open reading frame 181	1	400223
GC14M092718_at	MOAP1	modulator of apoptosis 1	1	64112
GC14M094953_at	C14orf49	chromosome 14 open reading frame 49	1	161176
GC14M102042_at	ANKRD9	ankyrin repeat domain 9	1	122416
GC14P020429_at	RNASE3	ribonuclease, RNase A family, 3 (eosinophil cationic protein)	1	6037
GC14P022859_at	PABPN1	poly(A) binding protein, nuclear 1	1	8106
GC14P091858_at	SLC24A4	solute carrier family 24 (sodium/potassium/calcium exchanger), member 4	1	123041
GC14P102128_at	RCOR1	REST corepressor 1	1	23186
GC15M053261_at	RSL24D1	ribosomal L24 domain containing 1	1	51187
GC15P037660_at	THBS1	thrombospondin 1	1	7057
GC15P039310_at	CHP	calcium binding protein P22	1	11261
GC15P048503_at	USP8	ubiquitin specific peptidase 8	1	9101
GC15P065145_at	SMAD3	SMAD family member 3	1	4088
GC15P073103_at	PPCDC	phosphopantothenoylcysteine decarboxylase	1	60490
GC15P073279_at	C15orf39	chromosome 15 open reading frame 39	1	56905
GC15P089301_at	RCCD1	RCC1 domain containing 1	1	91433
GC15P090197_at	SLCO3A1	solute carrier organic anion transporter family, member 3A1	1	28232
GC15U900016_at	FLJ10038	hypothetical protein FLJ10038	1	55056
GC16M004500_at	C16orf5	chromosome 16 open reading frame 5	1	29965
GC16M008894_at	USP7	ubiquitin specific peptidase 7 (herpes virus-associated)	1	7874
GC16M011839_at	RSL1D1	ribosomal L1 domain containing 1	1	26156
GC16M017108_at	XYLT1	xylosyltransferase I	1	64131
GC16M080739_at	MPHOSPH6	M-phase phosphoprotein 6	1	10200
GC16M087309_at	FAM38A	family with sequence similarity 38, member A	1	9780
GC16M088292_at	SPATA2L	spermatogenesis associated 2-like	1	124044
GC16P008624_at	C16orf68	chromosome 16 open reading frame 68	1	79091
GC16P021519_at	METTL9	methyltransferase like 9	1	51108
GC16P022216_at	POLR3E	polymerase (RNA) III (DNA directed) polypeptide E (80kD)	1	55718
GC16P028993_at	LOC653390	RRN3 RNA polymerase I transcription factor homolog (S. cerevisiae) pseudogene	1	653390
GC16P049333_at	CYLD	cylindromatosis (turban tumor syndrome)	1	1540
GC16P055553_at	CETP	cholesteryl ester transfer protein, plasma	1	1071
GC16P067724_at	CIRH1A	cirrhosis, autosomal recessive 1A (cirhin)	1	84916
GC16P070436_at	ATXN1L	ataxin 1-like	1	342371
GC16P070646_at	HP	haptoglobin	1	3240
GC16P083291_at	USP10	ubiquitin specific peptidase 10	1	9100
GC16P088154_at	RPL13	ribosomal protein L13	1	6137
GC17M017341_at	RASD1	RAS, dexamethasone-induced 1	1	51655
GC17M024613_at	NUFIP2	nuclear fragile X mental retardation protein interacting protein 2	1	57532
GC17M053733_at	BZRAP1	benzodiazapine receptor (peripheral) associated protein 1	1	9256
GC17M059433_at	ICAM2	intercellular adhesion molecule 2	1	3384
GC17M059474_at	ERN1	endoplasmic reticulum to nucleus signaling 1	1	2081
GC17M059926_at	DDX5	DEAD (Asp-Glu-Ala-Asp) box polypeptide 5	1	1655
GC17M071284_at	H3F3B	H3 histone, family 3B (H3.3B)	1	3021
GC17M072221_at	JMJD6	jumonji domain containing 6	1	23210
GC17M072241_at	SFRS2	splicing factor, arginine/serine-rich 2	1	6427
GC17M074295_at	USP36	ubiquitin specific peptidase 36	1	57602
GC17P001906_at	HIC1	hypermethylated in cancer 1	1	3090
GC17P004784_at	RNF167	ring finger protein 167	1	26001
GC17P007732_at	CHD3	chromodomain helicase DNA binding protein 3	1	1107
GC17P008279_at	NDEL1	nudE nuclear distribution gene E homolog (A. nidulans)-like 1	1	81565
GC17P016291_at	C17orf45	chromosome 17 open reading frame 45	1	125144
GC17P035718_at	RARA	retinoic acid receptor, alpha	1	5914
GC17P037099_at	EIF1	eukaryotic translation initiation factor 1	1	10209
GC17P052688_at	MSI2	musashi homolog 2 (Drosophila)	1	124540
GC17P076623_at	BAIAP2	BAI1-associated protein 2	1	10458
GC18M046955_at	MEX3C	mex-3 homolog C (C. elegans)	1	51320
GC18P009904_at	VAPA	VAMP (vesicle-associated membrane protein)-associated protein A, 33kDa	1	9218
GC18P011842_at	CHMP1B	chromatin modifying protein 1B	1	57132
GC18P013208_at	C18orf1	chromosome 18 open reading frame 1	1	753
GC18P019287_at	RIOK3	RIO kinase 3 (yeast)	1	8780
GC18P030875_at	MAPRE2	microtubule-associated protein, RP/EB family, member 2	1	10982
GC18P045597_at	SCARNA17	small Cajal body-specific RNA 17	1	677769
GC18P054489_at	MALT1	mucosa associated lymphoid tissue lymphoma translocation gene 1	1	10892
GC19M003927_at	EEF2	eukaryotic translation elongation factor 2	1	1938
GC19M004000_at	ZBTB7A	zinc finger and BTB domain containing 7A	1	51341
GC19M004489_at	LRG1	leucine-rich alpha-2-glycoprotein 1	1	116844
GC19M006330_at	GTF2F1	general transcription factor IIF, polypeptide 1, 74kDa	1	2962
GC19M006364_at	KHSRP	KH-type splicing regulatory protein	1	8570
GC19M009781_at	FBXL12	F-box and leucine-rich repeat protein 12	1	54850
GC19M010276_at	GLP-1	GATA like protein-1	1	100125288
GC19M016546_at	MED26	mediator complex subunit 26	1	9441
GC19M021126_at	RPL7AP68	ribosomal protein L7a pseudogene 68	1	729926
GC19M045430_at	AKT2	v-akt murine thymoma viral oncogene homolog 2	1	208
GC19M058989_at	NLRP12	NLR family, pyrin domain containing 12	1	91662
GC19M059236_at	VSTM1	V-set and transmembrane domain containing 1	1	284415
GC19P001199_at	MIDN	midnolin	1	90007
GC19P001920_at	CSNK1G2	casein kinase 1, gamma 2	1	1455
GC19P010258_at	ICAM4	intercellular adhesion molecule 4 (Landsteiner-Wiener blood group)	1	3386
GC19P018548_at	UBA52	ubiquitin A-52 residue ribosomal protein fusion product 1	1	7311
GC19P041085_at	HCST	hematopoietic cell signal transducer	1	10870
GC19P044589_at	ZFP36	zinc finger protein 36, C3H type, homolog (mouse)	1	7538
GC19P059062_at	MYADM	myeloid-associated differentiation marker	1	91663
GC19P060077_at	FCAR	Fc fragment of IgA, receptor for	1	2204
GC19P060589_at	RPL28	ribosomal protein L28	1	6158
GC19P063590_at	RPS5	ribosomal protein S5	1	6193
GC19U900384_at	LOC284454	hypothetical protein LOC284454	1	284454
GC20M005867_at	TRMT6	tRNA methyltransferase 6 homolog (S. cerevisiae)	1	51605
GC20M023008_at	CD93	CD93 molecule	1	22918
GC20M033755_at	RBM39	RNA binding motif protein 39	1	9584
GC20M042258_at	C20orf111	chromosome 20 open reading frame 111	1	51526
GC20P000762_at	FAM110A	family with sequence similarity 110, member A	1	83541
GC20P036365_at	BPI	bactericidal/permeability-increasing protein	1	671
GC20P041715_at	ENSG00000215467	NA	1	NA
GC20P042529_at	LOC100129292	hypothetical protein LOC100129292	1	100129292
GC20P047269_at	DDX27	DEAD (Asp-Glu-Ala-Asp) box polypeptide 27	1	55661
GC20P047310_at	C20orf199	chromosome 20 open reading frame 199	1	441951
GC20P048032_at	SNAI1	snail homolog 1 (Drosophila)	1	6615
GC20P054612_at	ENSG00000219489	NA	1	NA
GC20P057027_at	TUBB1	tubulin, beta 1	1	81027
GC20P060395_at	RPS21	ribosomal protein S21	1	6227
GC21M031965_at	SFRS15	splicing factor, arginine/serine-rich 15	1	57466
GC21M042280_at	ZNF295	zinc finger protein 295	1	49854
GC21P033364_at	OLIG1	oligodendrocyte transcription factor 1	1	116448
GC22M025612_at	ENSG00000219956	NA	1	NA
GC22M028960_at	LIF	leukemia inhibitory factor (cholinergic differentiation factor)	1	3976
GC22M030339_at	PISD	phosphatidylserine decarboxylase	1	23761
GC22M045400_at	CERK	ceramide kinase	1	64781
GC22M047997_at	ENSG00000217384	NA	1	NA
GC22M048800_at	MLC1	megalencephalic leukoencephalopathy with subcortical cysts 1	1	23209
GC22P016640_at	C22orf37	chromosome 22 open reading frame 37	1	200298
GC22P048635_at	ZBED4	zinc finger, BED-type containing 4	1	9889
GC01M000924_at	HES4	hairy and enhancer of split 4 (Drosophila)	2	57801
GC01M021417_at	ECE1	endothelin converting enzyme 1	2	1889
GC01M028170_at	EYA3	eyes absent homolog 3 (Drosophila)	2	2140
GC01M035470_at	SFPQ	splicing factor proline/glutamine-rich (polypyrimidine tract binding protein associated)	2	6421
GC01M037774_at	SNIP1	Smad nuclear interacting protein 1	2	79753
GC01M037805_at	GNL2	guanine nucleotide binding protein-like 2 (nucleolar)	2	29889
GC01M038041_at	YRDC	yrdC domain containing (E. coli)	2	79693
GC01M045858_at	CCDC17	coiled-coil domain containing 17	2	149483
GC01M078124_at	FUBP1	far upstream element (FUSE) binding protein 1	2	8880
GC01M089030_at	GTF2B	general transcription factor IIB	2	2959
GC01M094048_at	DNTTIP2	deoxynucleotidyltransferase, terminal, interacting protein 2	2	30836
GC01M094706_at	F3	coagulation factor III (thromboplastin, tissue factor)	2	2152
GC01M111015_at	KCNA3	potassium voltage-gated channel, shaker-related subfamily, member 3	2	3738
GC01M155357_at	ETV3	ets variant 3	2	2117
GC01M183532_at	IVNS1ABP	influenza virus NS1A binding protein	2	10625
GC01M184907_at	PTGS2	prostaglandin-endoperoxide synthase 2 (prostaglandin G/H synthase and cyclooxygenase)	2	5743
GC01M203833_at	ELK4	ELK4, ETS-domain protein (SRF accessory protein 1)	2	2005
GC01M222034_at	TP53BP2	tumor protein p53 binding protein, 2	2	7159
GC01M243081_at	HNRNPU	heterogeneous nuclear ribonucleoprotein U (scaffold attachment factor A)	2	3192
GC01P009523_at	SLC25A33	solute carrier family 25, member 33	2	84275
GC01P031556_at	SERINC2	serine incorporator 2	2	347735
GC01P039230_at	AKIRIN1	akirin 1	2	79647
GC01P040399_at	RLF	rearranged L-myc fusion	2	6018
GC01P045038_at	PLK3	polo-like kinase 3 (Drosophila)	2	1263
GC01P055237_at	BSND	Bartter syndrome, infantile, with sensorineural deafness (Barttin)	2	7809
GC01P065970_at	PDE4B	phosphodiesterase 4B, cAMP-specific (phosphodiesterase E4 dunce homolog, Drosophila)	2	5142
GC01P090173_at	ZNF326	zinc finger protein 326	2	284695
GC01P151025_at	LCE1E	late cornified envelope 1E	2	353135
GC01P179324_at	IER5	immediate early response 5	2	51278
GC01P201542_at	BTG2	BTG family, member 2	2	7832
GC01P202031_at	ZC3H11A	zinc finger CCCH-type containing 11A	2	9877
GC01P205561_at	CD55	CD55 molecule, decay accelerating factor for complement (Cromer blood group)	2	1604
GC01P210805_at	ATF3	activating transcription factor 3	2	467
GC01P221966_at	CAPN2	calpain 2, (m/II) large subunit	2	824
GC02M024337_at	ITSN2	intersectin 2	2	50618
GC02M037782_at	CDC42EP3	CDC42 effector protein (Rho GTPase binding) 3	2	10602
GC02M047869_at	FBXO11	F-box protein 11	2	80204
GC02M096230_at	DUSP2	dual specificity phosphatase 2	2	1844
GC02M197405_at	PGAP1	post-GPI attachment to proteins 1	2	80055
GC02M201417_at	CLK1	CDC-like kinase 1	2	1195
GC02M206566_at	INO80D	INO80 complex subunit D	2	54891
GC02M229597_at	PID1	phosphotyrosine interaction domain containing 1	2	55022
GC02P068504_at	PLEK	pleckstrin	2	5341
GC02P101773_at	MAP4K4	mitogen-activated protein kinase kinase kinase kinase 4	2	9448
GC02P198026_at	COQ10B	coenzyme Q10 homolog B (S. cerevisiae)	2	80219
GC02P203901_at	ABI2	abl interactor 2	2	10152
GC02U901591_at	LOC400960	hypothetical gene supported by BC040598	2	400960
GC03M053297_at	DCP1A	DCP1 decapping enzyme homolog A (S. cerevisiae)	2	55802
GC03M072506_at	RYBP	RING1 and YY1 binding protein	2	23429
GC03M120632_at	TMEM39A	transmembrane protein 39A	2	55254
GC03M120843_at	POPDC2	popeye domain containing 2	2	64091
GC03M187110_at	TRA2B	transformer 2 beta homolog (Drosophila)	2	6434
GC03P015443_at	EAF1	ELL associated factor 1	2	85403
GC03P067132_at	KBTBD8	kelch repeat and BTB (POZ) domain containing 8	2	84541
GC03P073128_at	PPP4R2	protein phosphatase 4, regulatory subunit 2	2	151987
GC03P073193_at	FLJ10213	hypothetical protein FLJ10213	2	55096
GC03P103051_at	NFKBIZ	nuclear factor of kappa light polypeptide gene enhancer in B-cells inhibitor, zeta	2	64332
GC03P158637_at	PTX3	pentraxin-related gene, rapidly induced by IL-1 beta	2	5806
GC03P184453_at	B3GNT5	UDP-GlcNAc:betaGal beta-1,3-N-acetylglucosaminyltransferase 5	2	84002
GC03P195336_at	HES1	hairy and enhancer of split 1, (Drosophila)	2	3280
GC04M084305_at	PLAC8	placenta-specific 8	2	51316
GC04M154850_at	RNF175	ring finger protein 175	2	285533
GC04P075470_at	EREG	epiregulin	2	2069
GC05M006428_at	MED10	mediator complex subunit 10	2	84246
GC05M032390_at	ZFR	zinc finger RNA binding protein	2	51663
GC05M132243_at	AFF4	AF4/FMR2 family, member 4	2	27125
GC05M137869_at	ETF1	eukaryotic translation termination factor 1	2	2107
GC05M141013_at	ARAP3	ArfGAP with RhoGAP domain, ankyrin repeat and PH domain 3	2	64411
GC05M156836_at	ADAM19	ADAM metallopeptidase domain 19 (meltrin beta)	2	8728
GC05M157146_at	CLINT1	clathrin interactor 1	2	9685
GC05M171403_at	STK10	serine/threonine kinase 10	2	6793
GC05M176816_at	DBN1	drebrin 1	2	1627
GC05P006790_at	POLS	polymerase (DNA directed) sigma	2	11044
GC05P007922_at	MTRR	5-methyltetrahydrofolate-homocysteine methyltransferase reductase	2	4552
GC06M002799_at	MGC39372	hypothetical protein MGC39372	2	221756
GC06M002832_at	SERPINB9	serpin peptidase inhibitor, clade B (ovalbumin), member 9	2	5272
GC06M039264_at	KCNK5	potassium channel, subfamily K, member 5	2	8645
GC06M041351_at	TREM1	triggering receptor expressed on myeloid cells 1	2	54210
GC06M044329_at	SLC35B2	solute carrier family 35, member B2	2	347734
GC06M044334_at	NFKBIE	nuclear factor of kappa light polypeptide gene enhancer in B-cells inhibitor, epsilon	2	4794
GC06M053240_at	ELOVL5	ELOVL family member 5, elongation of long chain fatty acids (FEN1/Elo2, SUR4/Elo3-like, yeast)	2	60481
GC06M151726_at	ZBTB2	zinc finger and BTB domain containing 2	2	57621
GC06M168275_at	FRMD1	FERM domain containing 1	2	79981
GC06P014225_at	CD83	CD83 molecule	2	9308
GC06P020510_at	E2F3	E2F transcription factor 3	2	1871
GC06P036754_at	CDKN1A	cyclin-dependent kinase inhibitor 1A (p21, Cip1)	2	1026
GC06P138230_at	TNFAIP3	tumor necrosis factor, alpha-induced protein 3	2	7128
GC07M023510_at	TRA2A	transformer 2 alpha homolog (Drosophila)	2	29896
GC07M026197_at	HNRNPA2B1	heterogeneous nuclear ribonucleoprotein A2/B1	2	3181
GC07M032874_at	KBTBD2	kelch repeat and BTB (POZ) domain containing 2	2	25948
GC07M044882_at	PURB	purine-rich element binding protein B	2	5814
GC07M044989_at	C7orf40	chromosome 7 open reading frame 40	2	285958
GC07M087745_at	STEAP4	STEAP family member 4	2	79689
GC07M102741_at	DNAJC2	DnaJ (Hsp40) homolog, subfamily C, member 2	2	27000
GC07M139680_at	SLC37A3	solute carrier family 37 (glycerol-3-phosphate transporter), member 3	2	84255
GC07M158513_at	VIPR2	vasoactive intestinal peptide receptor 2	2	7434
GC07P031693_at	C7orf16	chromosome 7 open reading frame 16	2	10842
GC07P032765_at	LOC401321	hypothetical LOC401321	2	401321
GC07P044612_at	OGDH	oxoglutarate (alpha-ketoglutarate) dehydrogenase (lipoamide)	2	4967
GC07P048094_at	UPP1	uridine phosphorylase 1	2	7378
GC07P055054_at	EGFR	epidermal growth factor receptor (erythroblastic leukemia viral (v-erb-b) oncogene homolog, avian)	2	1956
GC07P098993_at	ZNF655	zinc finger protein 655	2	79027
GC07P111633_at	ZNF277	zinc finger protein 277	2	11179
GC07P111850_at	IFRD1	interferon-related developmental regulator 1	2	3475
GC07P141342_at	MGAM	maltase-glucoamylase (alpha-glucosidase)	2	8972
GC07U901460_at	LOC285957	hypothetical protein LOC285957	2	285957
GC08M006715_at	DEFB1	defensin, beta 1	2	1672
GC08M011317_at	FAM167A	family with sequence similarity 167, member A	2	83648
GC08M022933_at	TNFRSF10B	tumor necrosis factor receptor superfamily, member 10b	2	8795
GC08M023049_at	TNFRSF10D	tumor necrosis factor receptor superfamily, member 10d, decoy with truncated death domain	2	8793
GC08M104481_at	SLC25A32	solute carrier family 25, member 32	2	81034
GC08P026204_at	PPP2R2A	protein phosphatase 2 (formerly 2A), regulatory subunit B, alpha isoform	2	5520
GC08P090839_at	RIPK2	receptor-interacting serine-threonine kinase 2	2	8767
GC08P128876_at	PVT1	Pvt1 oncogene (non-protein coding)	2	5820
GC08P133948_at	TG	thyroglobulin	2	7038
GC09M116704_at	TNFSF8	tumor necrosis factor (ligand) superfamily, member 8	2	944
GC09P138348_at	GPSM1	G-protein signaling modulator 1 (AGS3-like, C. elegans)	2	26086
GC09P138424_at	PMPCA	peptidase (mitochondrial processing) alpha	2	23203
GC0XM038013_at	RPGR	retinitis pigmentosa GTPase regulator	2	6103
GC0XM129026_at	ELF4	E74-like factor 4 (ets domain transcription factor)	2	2000
GC0XM131164_at	RAP2C	RAP2C, member of RAS oncogene family	2	57826
GC0XP041077_at	DDX3X	DEAD (Asp-Glu-Ala-Asp) box polypeptide 3, X-linked	2	1654
GC0XP070669_at	OGT	O-linked N-acetylglucosamine (GlcNAc) transferase (UDP-N-acetylglucosamine:polypeptide-N-acetylglucosaminyl transferase)	2	8473
GC0XP070714_at	ACRC	acidic repeat containing	2	93953
GC10M023645_at	C10orf67	chromosome 10 open reading frame 67	2	256815
GC10M029786_at	SVIL	supervillin	2	6840
GC10M073762_at	DNAJB12	DnaJ (Hsp40) homolog, subfamily B, member 12	2	54788
GC10P000988_at	GTPBP4	GTP binding protein 4	2	23560
GC10P018989_at	ARL5B	ADP-ribosylation factor-like 5B	2	221079
GC10P070518_at	SRGN	serglycin	2	5552
GC10P114700_at	TCF7L2	transcription factor 7-like 2 (T-cell specific, HMG-box)	2	6934
GC11M009117_at	DENND5A	DENN/MADD domain containing 5A	2	23258
GC11M014482_at	PSMA1	proteasome (prosome, macropain) subunit, alpha type, 1	2	5682
GC11M059098_at	OSBP	oxysterol binding protein	2	5007
GC11M064376_at	EHD1	EH-domain containing 1	2	10938
GC11M065178_at	RELA	v-rel reticuloendotheliosis viral oncogene homolog A (avian)	2	5970
GC11M093195_at	TAF1D	TATA box binding protein (TBP)-associated factor, RNA polymerase I, D, 41kDa	2	79101
GC11M111519_at	IL18	interleukin 18 (interferon-gamma-inducing factor)	2	3606
GC11M116154_at	ZNF259	zinc finger protein 259	2	8882
GC11P009550_at	WEE1	WEE1 homolog (S. pombe)	2	7465
GC11P064911_at	FRMD8	FERM domain containing 8	2	83786
GC11P066142_at	RBM4	RNA binding motif protein 4	2	5936
GC11P075157_at	DGAT2	diacylglycerol O-acyltransferase homolog 2 (mouse)	2	84649
GC11P101723_at	BIRC2	baculoviral IAP repeat-containing 2	2	329
GC12M047372_at	CCNT1	cyclin T1	2	904
GC12M088484_at	ATP2B1	ATPase, Ca++ transporting, plasma membrane 1	2	490
GC12M120138_at	CAMKK2	calcium/calmodulin-dependent protein kinase kinase 2, beta	2	10645
GC12M120700_at	RHOF	ras homolog gene family, member F (in filopodia)	2	54509
GC12M121555_at	RSRC2	arginine/serine-rich coiled-coil 2	2	65117
GC12P067919_at	CPSF6	cleavage and polyadenylation specific factor 6, 68kDa	2	11052
GC12U900111_at	LOC144438	hypothetical LOC144438	2	144438
GC13M020446_at	LATS2	LATS, large tumor suppressor, homolog 2 (Drosophila)	2	26524
GC14M020747_at	HNRNPC	heterogeneous nuclear ribonucleoprotein C (C1/C2)	2	3183
GC14M034940_at	NFKBIA	nuclear factor of kappa light polypeptide gene enhancer in B-cells inhibitor, alpha	2	4792
GC14M069580_at	SLC8A3	solute carrier family 8 (sodium/calcium exchanger), member 3	2	6547
GC14M072811_at	NUMB	numb homolog (Drosophila)	2	8650
GC14M104586_at	GPR132	G protein-coupled receptor 132	2	29933
GC14P021017_at	TOX4	TOX high mobility group box family member 4	2	9878
GC14P051383_at	GNG2	guanine nucleotide binding protein (G protein), gamma 2	2	54331
GC14P071065_at	SIPA1L1	signal-induced proliferation-associated 1 like 1	2	26037
GC14P072594_at	RBM25	RNA binding motif protein 25	2	58517
GC14P075688_at	C14orf118	chromosome 14 open reading frame 118	2	55668
GC14P102870_at	EIF5	eukaryotic translation initiation factor 5	2	1983
GC15M048358_at	GABPB1	GA binding protein transcription factor, beta subunit 1	2	2553
GC15M078040_at	BCL2A1	BCL2-related protein A1	2	597
GC15M087660_at	POLG	polymerase (DNA directed), gamma	2	5428
GC15P048433_at	LOC100129387	hypothetical LOC100129387	2	100129387
GC15P064466_at	MAP2K1	mitogen-activated protein kinase kinase 1	2	5604
GC15P070553_at	ARIH1	ariadne homolog, ubiquitin-conjugating enzyme E2 binding protein, 1 (Drosophila)	2	25820
GC15P072687_at	CLK3	CDC-like kinase 3	2	1198
GC15P086967_at	AEN	apoptosis enhancing nuclease	2	64782
GC15P096304_at	ARRDC4	arrestin domain containing 4	2	91947
GC16M000178_at	LUC7L	LUC7-like (S. cerevisiae)	2	55692
GC16M045547_at	DNAJA2	DnaJ (Hsp40) homolog, subfamily A, member 2	2	10294
GC16P001299_at	UBE2I	ubiquitin-conjugating enzyme E2I (UBC9 homolog, yeast)	2	7329
GC16P011669_at	SNN	stannin	2	8303
GC16P024458_at	RBBP6	retinoblastoma binding protein 6	2	5930
GC16P031098_at	FUS	fusion (involved in t(12;16) in malignant liposarcoma)	2	2521
GC16P088315_at	ZNF276	zinc finger protein 276	2	92822
GC16U990242_at	MGC23284	hypothetical LOC197187	2	197187
GC17M001570_at	C17orf91	chromosome 17 open reading frame 91	2	84981
GC17M034211_at	CCDC49	coiled-coil domain containing 49	2	54883
GC17M052323_at	TRIM25	tripartite motif-containing 25	2	7706
GC17M073864_at	SOCS3	suppressor of cytokine signaling 3	2	9021
GC17P007686_at	KDM6B	lysine (K)-specific demethylase 6B	2	23135
GC17P021128_at	MAP2K3	mitogen-activated protein kinase kinase 3	2	5606
GC18P008600_at	RAB12	RAB12, member RAS oncogene family	2	201475
GC18P022039_at	TAF4B	TAF4b RNA polymerase II, TATA box binding protein (TBP)-associated factor, 105kDa	2	6875
GC18P055718_at	PMAIP1	phorbol-12-myristate-13-acetate-induced protein 1	2	5366
GC19M005538_at	SAFB2	scaffold attachment factor B2	2	9667
GC19M041072_at	NFKBID	nuclear factor of kappa light polypeptide gene enhancer in B-cells inhibitor, delta	2	84807
GC19M048792_at	IRGQ	immunity-related GTPase family, Q	2	126298
GC19P001361_at	DAZAP1	DAZ associated protein 1	2	26528
GC19P002427_at	GADD45B	growth arrest and DNA-damage-inducible, beta	2	4616
GC19P008416_at	HNRNPM	heterogeneous nuclear ribonucleoprotein M	2	4670
GC19P010625_at	ILF3	interleukin enhancer binding factor 3, 90kDa	2	3609
GC19P011061_at	LDLR	low density lipoprotein receptor	2	3949
GC19P040298_at	FXYD3	FXYD domain containing ion transport regulator 3	2	5349
GC19P040633_at	FFAR2	free fatty acid receptor 2	2	2867
GC19P050702_at	VASP	vasodilator-stimulated phosphoprotein	2	7408
GC19P053667_at	CYTH2	cytohesin 2	2	9266
GC20M002390_at	SNRPB	small nuclear ribonucleoprotein polypeptides B and B1	2	6628
GC20M003908_at	RNF24	ring finger protein 24	2	11237
GC20M010566_at	JAG1	jagged 1 (Alagille syndrome)	2	182
GC20M061690_at	GMEB2	glucocorticoid modulatory element binding protein 2	2	26205
GC20P000227_at	ZCCHC3	zinc finger, CCHC domain containing 3	2	85364
GC20P032755_at	TP53INP2	tumor protein p53 inducible nuclear protein 2	2	58476
GC21M014779_at	SAMSN1	SAM domain, SH3 domain and nuclear localization signals 1	2	64092
GC21M018086_at	C21orf91	chromosome 21 open reading frame 91	2	54149
GC21M044468_at	ICOSLG	inducible T-cell co-stimulator ligand	2	23308
GC21M045508_at	POFUT2	protein O-fucosyltransferase 2	2	23275
GC21P039099_at	ETS2	v-ets erythroblastosis virus E26 oncogene homolog 2 (avian)	2	2114
GC22M016592_at	BID	BH3 interacting domain death agonist	2	637
GC22M027515_at	XBP1	X-box binding protein 1	2	7494
GC22M035001_at	MYH9	myosin, heavy chain 9, non-muscle	2	4627
GC22M048552_at	BRD1	bromodomain containing 1	2	23774
GC22P029692_at	TUG1	taurine upregulated 1 (non-protein coding)	2	55000
GC22P048740_at	PIM3	pim-3 oncogene	2	415116
GC01M001128_at	TNFRSF18	tumor necrosis factor receptor superfamily, member 18	3	8784
GC01M001136_at	TNFRSF4	tumor necrosis factor receptor superfamily, member 4	3	7293
GC01M007902_at	TNFRSF9	tumor necrosis factor receptor superfamily, member 9	3	3604
GC01M010642_at	CASZ1	castor zinc finger 1	3	54897
GC01M011668_at	MAD2L2	MAD2 mitotic arrest deficient-like 2 (yeast)	3	10459
GC01M033133_at	TMEM54	transmembrane protein 54	3	113452
GC01M115048_at	NRAS	neuroblastoma RAS viral (v-ras) oncogene homolog	3	4893
GC01M154640_at	C1orf61	chromosome 1 open reading frame 61	3	10485
GC01M166321_at	GPR161	G protein-coupled receptor 161	3	23432
GC01M180835_at	RGS16	regulator of G-protein signaling 16	3	6004
GC01M183027_at	FAM129A	family with sequence similarity 129, member A	3	116496
GC01M241718_at	AKT3	v-akt murine thymoma viral oncogene homolog 3 (protein kinase B, gamma)	3	10000
GC01P000946_at	AGRN	agrin	3	375790
GC01P024944_at	CLIC4	chloride intracellular channel 4	3	25932
GC01P032294_at	KHDRBS1	KH domain containing, RNA binding, signal transduction associated 1	3	10657
GC01P037712_at	ZC3H12A	zinc finger CCCH-type containing 12A	3	80149
GC01P151873_at	C1orf77	chromosome 1 open reading frame 77	3	26097
GC01P185064_at	PLA2G4A	phospholipase A2, group IVA (cytosolic, calcium-dependent)	3	5321
GC01P219120_at	HLX	H2.0-like homeobox	3	3142
GC01P239781_at	KMO	kynurenine 3-monooxygenase (kynurenine 3-hydroxylase)	3	8564
GC01U900889_at	LOC284475	hypothetical protein LOC284475	3	284475
GC01U901506_at	LOC644242	hypothetical protein LOC644242	3	644242
GC02M106168_at	UXS1	UDP-glucuronate decarboxylase 1	3	80146
GC02M113247_at	IL1A	interleukin 1, alpha	3	3552
GC02M113303_at	IL1B	interleukin 1, beta	3	3553
GC02M118389_at	CCDC93	coiled-coil domain containing 93	3	54520
GC02M120696_at	TMEM185B	transmembrane protein 185B (pseudogene)	3	79134
GC02M224325_at	AP1S3	adaptor-related protein complex 1, sigma 3 subunit	3	130340
GC02P027631_at	GCKR	glucokinase (hexokinase 4) regulator	3	2646
GC02P113451_at	IL1F9	interleukin 1 family, member 9	3	56300
GC02P113591_at	IL1RN	interleukin 1 receptor antagonist	3	3557
GC02P191453_at	GLS	glutaminase	3	2744
GC02P201689_at	CFLAR	CASP8 and FADD-like apoptosis regulator	3	8837
GC02P222997_at	SGPP2	sphingosine-1-phosphate phosphotase 2	3	130367
GC02P228386_at	CCL20	chemokine (C-C motif) ligand 20	3	6364
GC03M037004_at	EPM2AIP1	EPM2A (laforin) interacting protein 1	3	9852
GC03M037069_at	LRRFIP2	leucine rich repeat (in FLII) interacting protein 2	3	9209
GC03M195606_at	ATP13A3	ATPase type 13A3	3	79572
GC03M195790_at	TMEM44	transmembrane protein 44	3	93109
GC03P003143_at	TRNT1	tRNA nucleotidyl transferase, CCA-adding, 1	3	51095
GC03P010181_at	IRAK2	interleukin-1 receptor-associated kinase 2	3	3656
GC03P011223_at	HRH1	histamine receptor H1	3	3269
GC03P014142_at	TMEM43	transmembrane protein 43	3	79188
GC03P120799_at	PLA1A	phospholipase A1 member A	3	51365
GC03P132095_at	ATP2C1	ATPase, Ca++ transporting, type 2C, member 1	3	27032
GC03P143078_at	ATP1B3	ATPase, Na+/K+ transporting, beta 3 polypeptide	3	483
GC03P171619_at	CLDN11	claudin 11	3	5010
GC04M122868_at	ANXA5	annexin A5	3	308
GC04M146274_at	OTUD4	OTU domain containing 4	3	54726
GC04P103641_at	NFKB1	nuclear factor of kappa light polypeptide gene enhancer in B-cells 1	3	4790
GC04P154824_at	TLR2	toll-like receptor 2	3	7097
GC04U900557_at	LOC731424	hypothetical LOC731424	3	731424
GC05M043326_at	HMGCS1	3-hydroxy-3-methylglutaryl-Coenzyme A synthase 1 (soluble)	3	3157
GC05M126235_at	1999-02-28	membrane-associated ring finger (C3HC4) 3	3	115123
GC05M132360_at	ZCCHC10	zinc finger, CCHC domain containing 10	3	54819
GC05M142639_at	NR3C1	nuclear receptor subfamily 3, group C, member 1 (glucocorticoid receptor)	3	2908
GC05M146750_at	DPYSL3	dihydropyrimidinase-like 3	3	1809
GC05M150389_at	TNIP1	TNFAIP3 interacting protein 1	3	10318
GC05M158674_at	IL12B	interleukin 12B (natural killer cell stimulatory factor 2, cytotoxic lymphocyte maturation factor 2, p40)	3	3593
GC05M169607_at	LCP2	lymphocyte cytosolic protein 2 (SH2 domain containing leukocyte protein of 76kDa)	3	3937
GC05M171573_at	UBTD2	ubiquitin domain containing 2	3	92181
GC05P074668_at	HMGCR	3-hydroxy-3-methylglutaryl-Coenzyme A reductase	3	3156
GC05P134011_at	SEC24A	SEC24 family, member A (S. cerevisiae)	3	10802
GC06M143114_at	HIVEP2	human immunodeficiency virus type I enhancer binding protein 2	3	3097
GC06M161502_at	C6orf59	chromosome 6 open reading frame 59	3	79992
GC06P012398_at	EDN1	endothelin 1	3	1906
GC06P031652_at	TNF	tumor necrosis factor (TNF superfamily, member 2)	3	7124
GC06P036318_at	PNPLA1	patatin-like phospholipase domain containing 1	3	285848
GC06P043554_at	TJAP1	tight junction associated protein 1 (peripheral)	3	93643
GC06P046869_at	MEP1A	meprin A, alpha (PABA peptide hydrolase)	3	4224
GC06P161383_at	MAP3K4	mitogen-activated protein kinase kinase kinase 4	3	4216
GC07M020140_at	MACC1	metastasis associated in colon cancer 1	3	346389
GC07M041695_at	INHBA	inhibin, beta A	3	3624
GC07M041970_at	GLI3	GLI family zinc finger 3	3	2737
GC07M075001_at	HIP1	huntingtin interacting protein 1	3	3092
GC07M097760_at	BAIAP2L1	BAI1-associated protein 2-like 1	3	55971
GC07M100662_at	CLDN15	claudin 15	3	24146
GC07M141003_at	KIAA1147	KIAA1147	3	57189
GC07P022732_at	IL6	interleukin 6 (interferon, beta 2)	3	3569
GC07P038184_at	STARD3NL	STARD3 N-terminal like	3	83930
GC07P042938_at	MRPL32	mitochondrial ribosomal protein L32	3	64983
GC07P044207_at	YKT6	YKT6 v-SNARE homolog (S. cerevisiae)	3	10652
GC07P044756_at	ZMIZ2	zinc finger, MIZ-type containing 2	3	83637
GC07P086620_at	DMTF1	cyclin D binding myb-like transcription factor 1	3	9988
GC07P100515_at	TRIM56	tripartite motif-containing 56	3	81844
GC07P111909_at	C7orf53	chromosome 7 open reading frame 53	3	286006
GC08M008680_at	MFHAS1	malignant fibrous histiocytoma amplified sequence 1	3	9258
GC08M072916_at	MSC	musculin (activated B-cell factor-1)	3	9242
GC08M091015_at	NBN	nibrin	3	4683
GC08M101340_at	RNF19A	ring finger protein 19A	3	25897
GC08P090984_at	OSGIN2	oxidative stress induced growth inhibitor family member 2	3	734
GC08P123863_at	ZHX2	zinc fingers and homeoboxes 2	3	22882
GC08P143542_at	BAI1	brain-specific angiogenesis inhibitor 1	3	575
GC08U900740_at	DKFZp686L14188	hypothetical gene supported by BX538329	3	441366
GC09M122704_at	TRAF1	TNF receptor-associated factor 1	3	7185
GC09M135326_at	SLC2A6	solute carrier family 2 (facilitated glucose transporter), member 6	3	11182
GC09P134927_at	CEL	carboxyl ester lipase (bile salt-stimulated lipase)	3	1056
GC09P139255_at	TUBB2C	tubulin, beta 2C	3	10383
GC0XP046889_at	RBM10	RNA binding motif protein 10	3	8241
GC0XP129133_at	RAB33A	RAB33A, member RAS oncogene family	3	9363
GC0XP130984_at	RP6-213H19.1	serine/threonine protein kinase MST4	3	51765
GC0XP149282_at	MAMLD1	mastermind-like domain containing 1	3	10046
GC10P027027_at	PDSS1	prenyl (decaprenyl) diphosphate synthase, subunit 1	3	23590
GC10P027833_at	RAB18	RAB18, member RAS oncogene family	3	22931
GC10P106018_at	GSTO2	glutathione S-transferase omega 2	3	119391
GC10P112247_at	DUSP5	dual specificity phosphatase 5	3	1847
GC10P114123_at	ACSL5	acyl-CoA synthetase long-chain family member 5	3	51703
GC10P121400_at	BAG3	BCL2-associated athanogene 3	3	9531
GC11M002906_at	PHLDA2	pleckstrin homology-like domain, family A, member 2	3	7262
GC11M047444_at	CUGBP1	CUG triplet repeat, RNA binding protein 1	3	10658
GC11M122463_at	HSPA8	heat shock 70kDa protein 8	3	3312
GC11P063731_at	FERMT3	fermitin family homolog 3 (Drosophila)	3	83706
GC11P064838_at	CDC42EP2	CDC42 effector protein (Rho GTPase binding) 2	3	10435
GC12M012520_at	DUSP16	dual specificity phosphatase 16	3	80824
GC12M024855_at	BCAT1	branched chain aminotransferase 1, cytosolic	3	586
GC12M118995_at	RAB35	RAB35, member RAS oncogene family	3	11021
GC12P022670_at	ETNK1	ethanolamine kinase 1	3	55500
GC12P124074_at	AACS	acetoacetyl-CoA synthetase	3	65985
GC12U900585_at	LOC400043	hypothetical LOC400043	3	400043
GC13M030608_at	HSPH1	heat shock 105kDa/110kDa protein 1	3	10808
GC13M112881_at	PCID2	PCI domain containing 2	3	55795
GC13P035904_at	CCNA1	cyclin A1	3	8900
GC13P112911_at	CUL4A	cullin 4A	3	8451
GC14M034291_at	BAZ1A	bromodomain adjacent to zinc finger domain, 1A	3	11177
GC14M052394_at	FERMT2	fermitin family homolog 2 (Drosophila)	3	10979
GC14M054378_at	GCH1	GTP cyclohydrolase 1	3	2643
GC14M101619_at	HSP90AA1	heat shock protein 90kDa alpha (cytosolic), class A member 1	3	3320
GC14P103167_at	KLC1	kinesin light chain 1	3	3831
GC15M077924_at	MTHFS	5,10-methenyltetrahydrofolate synthetase (5-formyltetrahydrofolate cyclo-ligase)	3	10588
GC15P056217_at	AQP9	aquaporin 9	3	366
GC15P076343_at	DNAJA4	DnaJ (Hsp40) homolog, subfamily A, member 4	3	55466
GC15P079081_at	MESDC1	mesoderm development candidate 1	3	59274
GC15P086983_at	ISG20	interferon stimulated exonuclease gene 20kDa	3	3669
GC15P088609_at	NGRN	neugrin, neurite outgrowth associated	3	51335
GC16M018726_at	SMG1	SMG1 homolog, phosphatidylinositol 3-kinase-related kinase (C. elegans)	3	23049
GC16M020776_at	DCUN1D3	DCN1, defective in cullin neddylation 1, domain containing 3 (S. cerevisiae)	3	123879
GC16M068972_at	ST3GAL2	ST3 beta-galactoside alpha-2,3-sialyltransferase 2	3	6483
GC16M070677_at	TXNL4B	thioredoxin-like 4B	3	54957
GC16M079195_at	CDYL2	chromodomain protein, Y-like 2	3	124359
GC16P031792_at	ZNF267	zinc finger protein 267	3	10308
GC16P086542_at	BANP	BTG3 associated nuclear protein	3	54971
GC17M008724_at	PIK3R5	phosphoinositide-3-kinase, regulatory subunit 5	3	23533
GC17M031222_at	CCL5	chemokine (C-C motif) ligand 5	3	6352
GC17M031364_at	CCL23	chemokine (C-C motif) ligand 23	3	6368
GC17M062764_at	PSMD12	proteasome (prosome, macropain) 26S subunit, non-ATPase, 12	3	5718
GC17P031421_at	CCL4	chemokine (C-C motif) ligand 4	3	6351
GC17P035425_at	CSF3	colony stimulating factor 3 (granulocyte)	3	1440
GC17P071486_at	CDK3	cyclin-dependent kinase 3	3	1018
GC18P009126_at	ANKRD12	ankyrin repeat domain 12	3	23253
GC18P012299_at	TUBB6	tubulin, beta 6	3	84617
GC18P059705_at	SERPINB2	serpin peptidase inhibitor, clade B (ovalbumin), member 2	3	5055
GC19M006703_at	SH2D3A	SH2 domain containing 3A	3	10045
GC19M048962_at	KCNN4	potassium intermediate/small conductance calcium-activated channel, subfamily N, member 4	3	3783
GC19P010247_at	ICAM1	intercellular adhesion molecule 1	3	3383
GC19P040174_at	GRAMD1A	GRAM domain containing 1A	3	57655
GC19P040213_at	SCN1B	sodium channel, voltage-gated, type I, beta	3	6324
GC19P040223_at	HPN	hepsin	3	3249
GC20M044123_at	NCOA5	nuclear receptor coactivator 5	3	57727
GC20M047287_at	ZNFX1	zinc finger, NFX1-type containing 1	3	57169
GC20M047682_at	B4GALT5	UDP-Gal:betaGlcNAc beta 1,4- galactosyltransferase, polypeptide 5	3	9334
GC20P034429_at	DLGAP4	discs, large (Drosophila) homolog-associated protein 4	3	22839
GC20P035351_at	MANBAL	mannosidase, beta A, lysosomal-like	3	63905
GC20P035406_at	SRC	v-src sarcoma (Schmidt-Ruppin A-2) viral oncogene homolog (avian)	3	6714
GC21M017887_at	BTG3	BTG family, member 3	3	10950
GC21P025872_at	MIRHG2	microRNA host gene 2 (non-protein coding)	3	114614
GC21U900003_at	C21orf71	chromosome 21 open reading frame 71	3	282566
GC22M034946_at	APOL2	apolipoprotein L, 2	3	23780
GC22M040327_at	PPPDE2	PPPDE peptidase domain containing 2	3	27351
GC22M041340_at	CYB5R3	cytochrome b5 reductase 3	3	1727
GC22M041517_at	ARFGAP3	ADP-ribosylation factor GTPase activating protein 3	3	26286
GC22P022997_at	ADORA2A	adenosine A2a receptor	3	135
GC22P023215_at	UPB1	ureidopropionase, beta	3	51733
GC22P036632_at	MICALL1	MICAL-like 1	3	85377
GC22P036922_at	MAFF	v-maf musculoaponeurotic fibrosarcoma oncogene homolog F (avian)	3	23764
GC01M001220_at	ACAP3	ArfGAP with coiled-coil, ankyrin repeat and PH domains 3	4	116983
GC01M003396_at	MEGF6	multiple EGF-like-domains 6	4	1953
GC01M006179_at	RPL22	ribosomal protein L22	4	6146
GC01M009842_at	CTNNBIP1	catenin, beta interacting protein 1	4	56998
GC01M017605_at	RCC2	regulator of chromosome condensation 2	4	55920
GC01M026481_at	UBXN11	UBX domain protein 11	4	91544
GC01M036753_at	CSF3R	colony stimulating factor 3 receptor (granulocyte)	4	1441
GC01M038195_at	SF3A3	splicing factor 3a, subunit 3, 60kDa	4	10946
GC01M038235_at	FHL3	four and a half LIM domains 3	4	2275
GC01M039799_at	PABPC4	poly(A) binding protein, cytoplasmic 4 (inducible form)	4	8761
GC01M048536_at	SPATA6	spermatogenesis associated 6	4	54558
GC01M068336_at	GPR177	G protein-coupled receptor 177	4	79971
GC01M101227_at	DPH5	DPH5 homolog (S. cerevisiae)	4	51611
GC01M109625_at	PSRC1	proline/serine-rich coiled-coil 1	4	84722
GC01M114157_at	PTPN22	protein tyrosine phosphatase, non-receptor type 22 (lymphoid)	4	26191
GC01M115049_at	CSDE1	cold shock domain containing E1, RNA-binding	4	7812
GC01M115303_at	TSPAN2	tetraspanin 2	4	10100
GC01M145124_at	FMO5	flavin containing monooxygenase 5	4	2330
GC01M151783_at	S100A4	S100 calcium binding protein A4	4	6275
GC01M154700_at	MEF2D	myocyte enhancer factor 2D	4	4209
GC01M158452_at	WDR42A	WD repeat domain 42A	4	50717
GC01M167926_at	SELL	selectin L	4	6402
GC01M176258_at	LOC730102	hypothetical protein LOC730102	4	730102
GC01M204831_at	LGTN	ligatin	4	1939
GC01M224886_at	ITPKB	inositol 1,4,5-trisphosphate 3-kinase B	4	3707
GC01M232593_at	TARBP1	TAR (HIV-1) RNA binding protein 1	4	6894
GC01M233339_at	TOMM20	translocase of outer mitochondrial membrane 20 homolog (yeast)	4	9804
GC01M245527_at	ZNF496	zinc finger protein 496	4	84838
GC01P001540_at	MIB2	mindbomb homolog 2 (Drosophila)	4	142678
GC01P001939_at	PRKCZ	protein kinase C, zeta	4	5590
GC01P009991_at	RBP7	retinol binding protein 7, cellular	4	116362
GC01P017507_at	PADI4	peptidyl arginine deiminase, type IV	4	23569
GC01P020788_at	CDA	cytidine deaminase	4	978
GC01P023890_at	RPL11	ribosomal protein L11	4	6135
GC01P024842_at	SRRM1	serine/arginine repetitive matrix 1	4	10250
GC01P026516_at	CD52	CD52 molecule	4	1043
GC01P027541_at	SYTL1	synaptotagmin-like 1	4	84958
GC01P032889_at	RBBP4	retinoblastoma binding protein 4	4	5928
GC01P044938_at	C1orf228	chromosome 1 open reading frame 228	4	339541
GC01P061103_at	NFIA	nuclear factor I/A	4	4774
GC01P063831_at	PGM1	phosphoglucomutase 1	4	5236
GC01P070383_at	SFRS11	splicing factor, arginine/serine-rich 11	4	9295
GC01P078126_at	NEXN	nexilin (F actin binding protein)	4	91624
GC01P084255_at	PRKACB	protein kinase, cAMP-dependent, catalytic, beta	4	5567
GC01P084657_at	BXDC5	brix domain containing 5	4	80135
GC01P109504_at	CELSR2	cadherin, EGF LAG seven-pass G-type receptor 2 (flamingo homolog, Drosophila)	4	1952
GC01P109963_at	AMPD2	adenosine monophosphate deaminase 2 (isoform L)	4	271
GC01P115986_at	VANGL1	vang-like 1 (van gogh, Drosophila)	4	81839
GC01P117257_at	IGSF2	immunoglobulin superfamily, member 2	4	9398
GC01P148604_at	RPRD2	regulation of nuclear pre-mRNA domain containing 2	4	23248
GC01P156490_at	CD1A	CD1a molecule	4	909
GC01P156590_at	CD1E	CD1e molecule	4	913
GC01P157526_at	FCER1A	Fc fragment of IgE, high affinity I, receptor for; alpha polypeptide	4	2205
GC01P171713_at	PRDX6	peroxiredoxin 6	4	9588
GC01P172395_at	RABGAP1L	RAB GTPase activating protein 1-like	4	9910
GC01P190394_at	RGS18	regulator of G-protein signaling 18	4	64407
GC01P191044_at	RGS2	regulator of G-protein signaling 2, 24kDa	4	5997
GC01P196138_at	C1orf53	chromosome 1 open reading frame 53	4	388722
GC01P205293_at	PFKFB2	6-phosphofructo-2-kinase/fructose-2,6-biphosphatase 2	4	5208
GC01P205736_at	CR1	complement component (3b/4b) receptor 1 (Knops blood group)	4	1378
GC01P219026_at	MOSC1	MOCO sulphurase C-terminal domain containing 1	4	64757
GC01P242281_at	ZNF238	zinc finger protein 238	4	10472
GC02M008910_at	MBOAT2	membrane bound O-acyltransferase domain containing 2	4	129642
GC02M024866_at	C2orf79	chromosome 2 open reading frame 79	4	391356
GC02M026325_at	HADHA	hydroxyacyl-Coenzyme A dehydrogenase/3-ketoacyl-Coenzyme A thiolase/enoyl-Coenzyme A hydratase (trifunctional protein), alpha subunit	4	3030
GC02M039875_at	THUMPD2	THUMP domain containing 2	4	80745
GC02M042489_at	COX7A2L	cytochrome c oxidase subunit VIIa polypeptide 2 like	4	9167
GC02M043362_at	ZFP36L2	zinc finger protein 36, C3H type-like 2	4	678
GC02M043369_at	THADA	thyroid adenoma associated	4	63892
GC02M064770_at	SERTAD2	SERTA domain containing 2	4	9792
GC02M087111_at	LOC285074	anaphase promoting complex subunit 1 pseudogene	4	285074
GC02M100990_at	TBC1D8	TBC1 domain family, member 8 (with GRAM domain)	4	11138
GC02M127780_at	MAP3K2	mitogen-activated protein kinase kinase kinase 2	4	10746
GC02M157884_at	ERMN	ermin, ERM-like protein	4	57471
GC02M160333_at	CD302	CD302 molecule	4	9936
GC02M168518_at	STK39	serine threonine kinase 39 (STE20/SPS1 homolog, yeast)	4	27347
GC02M174646_at	OLA1	Obg-like ATPase 1	4	29789
GC02M179004_at	PRKRA	protein kinase, interferon-inducible double stranded RNA dependent activator	4	8575
GC02M196709_at	STK17B	serine/threonine kinase 17b	4	9262
GC02M197964_at	SF3B1	splicing factor 3b, subunit 1, 155kDa	4	23451
GC02M202779_at	SUMO1	SMT3 suppressor of mif two 3 homolog 1 (S. cerevisiae)	4	7341
GC02M216611_at	PECR	peroxisomal trans-2-enoyl-CoA reductase	4	55825
GC02M219823_at	TUBA4A	tubulin, alpha 4a	4	7277
GC02M235066_at	ARL4C	ADP-ribosylation factor-like 4C	4	10123
GC02P010100_at	KLF11	Kruppel-like factor 11	4	8462
GC02P020510_at	RHOB	ras homolog gene family, member B	4	388
GC02P030223_at	YPEL5	yippee-like 5 (Drosophila)	4	51646
GC02P031310_at	EHD3	EH-domain containing 3	4	30845
GC02P061316_at	AHSA2	AHA1, activator of heat shock 90kDa protein ATPase homolog 2 (yeast)	4	130872
GC02P074127_at	TET3	tet oncogene family member 3	4	200424
GC02P086800_at	RMND5A	required for meiotic nuclear division 5 homolog A (S. cerevisiae)	4	64795
GC02P111597_at	BCL2L11	BCL2-like 11 (apoptosis facilitator)	4	10018
GC02P138977_at	SPOPL	speckle-type POZ protein-like	4	339745
GC02P143565_at	ARHGAP15	Rho GTPase activating protein 15	4	55843
GC02P159021_at	PKP4	plakophilin 4	4	8502
GC02P182029_at	ITGA4	integrin, alpha 4 (antigen CD49D, alpha 4 subunit of VLA-4 receptor)	4	3676
GC02P187060_at	ZC3H15	zinc finger CCCH-type containing 15	4	55854
GC02P200485_at	C2orf69	chromosome 2 open reading frame 69	4	205327
GC02P203209_at	FAM117B	family with sequence similarity 117, member B	4	150864
GC02P218832_at	GPBAR1	G protein-coupled bile acid receptor 1	4	151306
GC02P218972_at	CTDSP1	CTD (carboxy-terminal domain, RNA polymerase II, polypeptide A) small phosphatase 1	4	58190
GC02P233927_at	DGKD	diacylglycerol kinase, delta 130kDa	4	8527
GC02U900510_at	LOC200772	hypothetical protein LOC200772	4	200772
GC03M003166_at	CRBN	cereblon	4	51185
GC03M010302_at	GHRL	ghrelin/obestatin prepropeptide	4	51738
GC03M010318_at	SEC13	SEC13 homolog (S. cerevisiae)	4	6396
GC03M013332_at	NUP210	nucleoporin 210kDa	4	23225
GC03M015065_at	MRPS25	mitochondrial ribosomal protein S25	4	64432
GC03M018364_at	SATB1	SATB homeobox 1	4	6304
GC03M039279_at	CX3CR1	chemokine (C-X3-C motif) receptor 1	4	1524
GC03M048639_at	SLC26A6	solute carrier family 26, member 6	4	65010
GC03M049036_at	IMPDH2	IMP (inosine monophosphate) dehydrogenase 2	4	3615
GC03M049429_at	AMT	aminomethyltransferase	4	275
GC03M052822_at	ITIH4	inter-alpha (globulin) inhibitor H4 (plasma Kallikrein-sensitive glycoprotein)	4	3700
GC03M052842_at	MUSTN1	musculoskeletal, embryonic nuclear protein 1	4	389125
GC03M102850_at	ZBTB11	zinc finger and BTB domain containing 11	4	27107
GC03M122832_at	HCLS1	hematopoietic cell-specific Lyn substrate 1	4	3059
GC03M130372_at	CNBP	CCHC-type zinc finger, nucleic acid binding protein	4	7555
GC03M168680_at	WDR49	WD repeat domain 49	4	151790
GC03M196271_at	C3orf21	chromosome 3 open reading frame 21	4	152002
GC03M196722_at	PPP1R2	protein phosphatase 1, regulatory (inhibitor) subunit 2	4	5504
GC03P009748_at	BRPF1	bromodomain and PHD finger containing, 1	4	7862
GC03P010303_at	C3orf42	chromosome 3 open reading frame 42	4	84657
GC03P023933_at	RPL15	ribosomal protein L15	4	6138
GC03P033130_at	CRTAP	cartilage associated protein	4	10491
GC03P042108_at	TRAK1	trafficking protein, kinesin binding 1	4	22906
GC03P042505_at	VIPR1	vasoactive intestinal peptide receptor 1	4	7433
GC03P043303_at	SNRK	SNF related kinase	4	54861
GC03P045043_at	CLEC3B	C-type lectin domain family 3, member B	4	7123
GC03P054131_at	CACNA2D3	calcium channel, voltage-dependent, alpha 2/delta subunit 3	4	55799
GC03P066376_at	SLC25A26	solute carrier family 25, member 26	4	115286
GC03P114734_at	SIDT1	SID1 transmembrane family, member 1	4	54847
GC03P123036_at	EAF2	ELL associated factor 2	4	55840
GC03P123256_at	CD86	CD86 molecule	4	942
GC03P123526_at	CSTA	cystatin A (stefin A)	4	1475
GC03P124269_at	PDIA5	protein disulfide isomerase family A, member 5	4	10954
GC03P139389_at	ARMC8	armadillo repeat containing 8	4	25852
GC03P144202_at	SR140	U2-associated SR140 protein	4	23350
GC03P162422_at	NMD3	NMD3 homolog (S. cerevisiae)	4	51068
GC03P198157_at	LOC152217	hypothetical LOC152217	4	152217
GC04M002216_at	MXD4	MAX dimerization protein 4	4	10608
GC04M015772_at	TAPT1	transmembrane anterior posterior transformation 1	4	202018
GC04M042105_at	ATP8A1	ATPase, aminophospholipid transporter (APLT), class I, type 8A, member 1	4	10396
GC04M070641_at	SULT1B1	sulfotransferase family, cytosolic, 1B, member 1	4	27284
GC04M077050_at	NAAA	N-acylethanolamine acid amidase	4	27163
GC04M078159_at	CCNI	cyclin I	4	10983
GC04M082608_at	MOP-1	MOP-1	4	643616
GC04M083563_at	HNRPDL	heterogeneous nuclear ribonucleoprotein D-like	4	9987
GC04M089661_at	PIGY	phosphatidylinositol glycan anchor biosynthesis, class Y	4	84992
GC04M102163_at	PPP3CA	protein phosphatase 3 (formerly 2B), catalytic subunit, alpha isoform	4	5530
GC04M140198_at	ELF2	E74-like factor 2 (ets domain transcription factor)	4	1998
GC04M140856_at	MAML3	mastermind-like 3 (Drosophila)	4	55534
GC04M153766_at	TMEM154	transmembrane protein 154	4	201799
GC04M157902_at	PDGFC	platelet derived growth factor C	4	56034
GC04M174489_at	HMGB2	high-mobility group box 2	4	3148
GC04M174545_at	SCRG1	scrapie responsive protein 1	4	11341
GC04P000970_at	IDUA	iduronidase, alpha-L-	4	3425
GC04P037569_at	TBC1D1	TBC1 (tre-2/USP6, BUB2, cdc16) domain family, member 1	4	23216
GC04P057028_at	SRP72	signal recognition particle 72kDa	4	6731
GC04P100162_at	METAP1	methionyl aminopeptidase 1	4	23173
GC04P124532_at	LOC729345	hypothetical LOC729345	4	729345
GC04P124600_at	SPRY1	sprouty homolog 1, antagonist of FGF signaling (Drosophila)	4	10252
GC04P140886_at	MGST2	microsomal glutathione S-transferase 2	4	4258
GC04P154607_at	KIAA0922	KIAA0922	4	23240
GC04P174528_at	SAP30	Sin3A-associated protein, 30kDa	4	8819
GC05M049731_at	EMB	embigin homolog (mouse)	4	133418
GC05M058302_at	PDE4D	phosphodiesterase 4D, cAMP-specific (phosphodiesterase E3 dunce homolog, Drosophila)	4	5144
GC05M076408_at	ZBED3	zinc finger, BED-type containing 3	4	84327
GC05M088051_at	MEF2C	myocyte enhancer factor 2C	4	4208
GC05M127621_at	FBN2	fibrillin 2	4	2201
GC05M136339_at	SPOCK1	sparc/osteonectin, cwcv and kazal-like domains proteoglycan (testican) 1	4	6695
GC05M149803_at	RPS14	ribosomal protein S14	4	6208
GC05M150541_at	CCDC69	coiled-coil domain containing 69	4	26112
GC05M180596_at	GNB2L1	guanine nucleotide binding protein (G protein), beta polypeptide 2-like 1	4	10399
GC05P056241_at	C5orf35	chromosome 5 open reading frame 35	4	133383
GC05P061912_at	LRRC70	leucine rich repeat containing 70	4	100130733
GC05P076150_at	F2RL1	coagulation factor II (thrombin) receptor-like 1	4	2150
GC05P076181_at	S100Z	S100 calcium binding protein Z	4	170591
GC05P076542_at	PDE8B	phosphodiesterase 8B	4	8622
GC05P078609_at	JMY	junction mediating and regulatory protein, p53 cofactor	4	133746
GC05P085949_at	COX7C	cytochrome c oxidase subunit VIIc	4	1350
GC05P111528_at	C5orf26	chromosome 5 open reading frame 26	4	114915
GC05P137702_at	FAM53C	family with sequence similarity 53, member C	4	51307
GC05P138657_at	MATR3	matrin 3	4	9782
GC05P138706_at	PAIP2	poly(A) binding protein interacting protein 2	4	51247
GC05P156674_at	CYFIP2	cytoplasmic FMR1 interacting protein 2	4	26999
GC05P175749_at	HIGD2A	HIG1 hypoxia inducible domain family, member 2A	4	192286
GC05P176717_at	RGS14	regulator of G-protein signaling 14	4	10636
GC05P176786_at	GRK6	G protein-coupled receptor kinase 6	4	2870
GC06M006089_at	F13A1	coagulation factor XIII, A1 polypeptide	4	2162
GC06M020209_at	MBOAT1	membrane bound O-acyltransferase domain containing 1	4	154141
GC06M033493_at	CUTA	cutA divalent cation tolerance homolog (E. coli)	4	51596
GC06M042965_at	C6orf226	chromosome 6 open reading frame 226	4	441150
GC06M056430_at	DST	dystonin	4	667
GC06M099955_at	SFRS18	splicing factor, arginine/serine-rich 18	4	25957
GC06M100096_at	CCNC	cyclin C	4	892
GC06M109890_at	ZBTB24	zinc finger and BTB domain containing 24	4	9841
GC06M112089_at	FYN	FYN oncogene related to SRC, FGR, YES	4	2534
GC06M133132_at	C6orf192	chromosome 6 open reading frame 192	4	116843
GC06M134533_at	SGK1	serum/glucocorticoid regulated kinase 1	4	6446
GC06M136621_at	BCLAF1	BCL2-associated transcription factor 1	4	9774
GC06M143789_at	ADAT2	adenosine deaminase, tRNA-specific 2, TAD2 homolog (S. cerevisiae)	4	134637
GC06M144457_at	SF3B5	splicing factor 3b, subunit 5, 10kDa	4	83443
GC06M152485_at	SYNE1	spectrin repeat containing, nuclear envelope 1	4	23345
GC06M154517_at	IPCEF1	interaction protein for cytohesin exchange factors 1	4	26034
GC06M169845_at	PHF10	PHD finger protein 10	4	55274
GC06P006533_at	LY86	lymphocyte antigen 86	4	9450
GC06P016237_at	MYLIP	myosin regulatory light chain interacting protein	4	29116
GC06P021701_at	SOX4	SRY (sex determining region Y)-box 4	4	6659
GC06P031910_at	C6orf48	chromosome 6 open reading frame 48	4	50854
GC06P033280_at	HSD17B8	hydroxysteroid (17-beta) dehydrogenase 8	4	7923
GC06P043037_at	GNMT	glycine N-methyltransferase	4	27232
GC06P044295_at	SLC29A1	solute carrier family 29 (nucleoside transporters), member 1	4	2030
GC06P080873_at	BCKDHB	branched chain keto acid dehydrogenase E1, beta polypeptide	4	594
GC06P138767_at	HEBP2	heme binding protein 2	4	23593
GC06P144654_at	UTRN	utrophin	4	7402
GC06P159041_at	SYTL3	synaptotagmin-like 3	4	94120
GC07M025140_at	C7orf31	chromosome 7 open reading frame 31	4	136895
GC07M027837_at	JAZF1	JAZF zinc finger 1	4	221895
GC07M029001_at	CPVL	carboxypeptidase, vitellogenic-like	4	54504
GC07M065064_at	GUSB	glucuronidase, beta	4	2990
GC07M066090_at	SBDS	Shwachman-Bodian-Diamond syndrome	4	51119
GC07M081166_at	HGF	hepatocyte growth factor (hepapoietin A; scatter factor)	4	3082
GC07M094872_at	PON2	paraoxonase 2	4	5445
GC07M098928_at	ZNF394	zinc finger protein 394	4	84124
GC07M134521_at	WDR91	WD repeat domain 91	4	29062
GC07M149094_at	ZNF467	zinc finger protein 467	4	168544
GC07M150566_at	SMARCD3	SWI/SNF related, matrix associated, actin dependent regulator of chromatin, subfamily d, member 3	4	6604
GC07M157024_at	PTPRN2	protein tyrosine phosphatase, receptor type, N polypeptide 2	4	5799
GC07P000822_at	UNC84A	unc-84 homolog A (C. elegans)	4	23353
GC07P029200_at	CHN2	chimerin (chimaerin) 2	4	1124
GC07P044803_at	PPIA	peptidylprolyl isomerase A (cyclophilin A)	4	5478
GC07P056099_at	SUMF2	sulfatase modifying factor 2	4	25870
GC07P073227_at	EIF4H	eukaryotic translation initiation factor 4H	4	7458
GC07P100290_at	SLC12A9	solute carrier family 12 (potassium/chloride transporters), member 9	4	56996
GC07P120415_at	C7orf58	chromosome 7 open reading frame 58	4	79974
GC07P129913_at	MEST	mesoderm specific transcript homolog (mouse)	4	4232
GC07U900134_at	LOC222070	hypothetical protein LOC222070	4	222070
GC08M019306_at	CSGALNACT1	chondroitin sulfate N-acetylgalactosaminyltransferase 1	4	55790
GC08M021822_at	DOK2	docking protein 2, 56kDa	4	9046
GC08M022553_at	FLJ14107	hypothetical LOC80094	4	80094
GC08M048812_at	CEBPD	CCAAT/enhancer binding protein (C/EBP), delta	4	1052
GC08M057148_at	RPS20	ribosomal protein S20	4	6224
GC08M067996_at	SNHG6	small nucleolar RNA host gene 6 (non-protein coding)	4	641638
GC08M082777_at	ZFAND1	zinc finger, AN1-type domain 1	4	79752
GC08M097311_at	UQCRB	ubiquinol-cytochrome c reductase binding protein	4	7381
GC08M099123_at	RPL30	ribosomal protein L30	4	6156
GC08M108330_at	ANGPT1	angiopoietin 1	4	284
GC08M109284_at	EIF3E	eukaryotic translation initiation factor 3, subunit E	4	3646
GC08M117727_at	EIF3H	eukaryotic translation initiation factor 3, subunit H	4	8667
GC08M133653_at	LRRC6	leucine rich repeat containing 6	4	23639
GC08M133792_at	TMEM71	transmembrane protein 71	4	137835
GC08M141737_at	PTK2	PTK2 protein tyrosine kinase 2	4	5747
GC08M144463_at	TOP1MT	topoisomerase (DNA) I, mitochondrial	4	116447
GC08M144733_at	EEF1D	eukaryotic translation elongation factor 1 delta (guanine nucleotide exchange protein)	4	1936
GC08M145969_at	ZNF34	zinc finger protein 34	4	80778
GC08P001912_at	KBTBD11	kelch repeat and BTB (POZ) domain containing 11	4	9920
GC08P028230_at	PNOC	prepronociceptin	4	5368
GC08P031617_at	NRG1	neuregulin 1	4	3084
GC08P037673_at	ZNF703	zinc finger protein 703	4	80139
GC08P037773_at	GPR124	G protein-coupled receptor 124	4	25960
GC08P038007_at	EIF4EBP1	eukaryotic translation initiation factor 4E binding protein 1	4	1978
GC08P057286_at	CHCHD7	coiled-coil-helix-coiled-coil-helix domain containing 7	4	79145
GC08P067507_at	ADHFE1	alcohol dehydrogenase, iron containing, 1	4	137872
GC08P097343_at	PTDSS1	phosphatidylserine synthase 1	4	9791
GC08P102451_at	NACAP1	nascent-polypeptide-associated complex alpha polypeptide pseudogene 1	4	83955
GC08P110416_at	ENY2	enhancer of yellow 2 homolog (Drosophila)	4	56943
GC08P120955_at	DEPDC6	DEP domain containing 6	4	64798
GC08P125556_at	RNF139	ring finger protein 139	4	11236
GC08P141590_at	CHRAC1	chromatin accessibility complex 1	4	54108
GC08P142501_at	PTP4A3	protein tyrosine phosphatase type IVA, member 3	4	11156
GC08U900745_at	LOC346887	similar to solute carrier family 16 (monocarboxylic acid transporters), member 14	4	346887
GC09M019366_at	RPS6	ribosomal protein S6	4	6194
GC09M020994_at	PTPLAD2	protein tyrosine phosphatase-like A domain containing 2	4	401494
GC09M027539_at	C9orf72	chromosome 9 open reading frame 72	4	203228
GC09M035802_at	HINT2	histidine triad nucleotide binding protein 2	4	84681
GC09M074159_at	ZFAND5	zinc finger, AN1-type domain 5	4	7763
GC09M074705_at	ALDH1A1	aldehyde dehydrogenase 1 family, member A1	4	216
GC09M085775_at	HNRNPK	heterogeneous nuclear ribonucleoprotein K	4	3190
GC09M087351_at	AGTPBP1	ATP/GTP binding protein 1	4	23287
GC09M109286_at	KLF4	Kruppel-like factor 4 (gut)	4	9314
GC09M116138_at	AKNA	AT-hook transcription factor	4	80709
GC09M123249_at	GGTA1	glycoprotein, alpha-galactosyltransferase 1	4	2681
GC09M126948_at	PPP6C	protein phosphatase 6, catalytic subunit	4	5537
GC09M131629_at	C9orf78	chromosome 9 open reading frame 78	4	51759
GC09M136940_at	FCN1	ficolin (collagen/fibrinogen domain containing) 1	4	2219
GC09M139076_at	C9orf140	chromosome 9 open reading frame 140	4	89958
GC09P034643_at	IL11RA	interleukin 11 receptor, alpha	4	3590
GC09P070510_at	PIP5K1B	phosphatidylinositol-4-phosphate 5-kinase, type I, beta	4	8395
GC09P070840_at	FXN	frataxin	4	2395
GC09P095253_at	FAM120A	family with sequence similarity 120A	4	23196
GC09P129963_at	C9orf16	chromosome 9 open reading frame 16	4	79095
GC09P130485_at	SET	SET nuclear oncogene	4	6418
GC09P134026_at	NTNG2	netrin G2	4	84628
GC09P136358_at	RXRA	retinoid X receptor, alpha	4	6256
GC09P137106_at	OLFM1	olfactomedin 1	4	10439
GC0XM001548_at	SLC25A6	solute carrier family 25 (mitochondrial carrier; adenine nucleotide translocator), member 6	4	293
GC0XM001625_at	P2RY8	purinergic receptor P2Y, G-protein coupled, 8	4	286530
GC0XM015753_at	AP1S2	adaptor-related protein complex 1, sigma 2 subunit	4	8905
GC0XM018820_at	PHKA2	phosphorylase kinase, alpha 2 (liver)	4	5256
GC0XM019462_at	SH3KBP1	SH3-domain kinase binding protein 1	4	30011
GC0XM023911_at	KLHL15	kelch-like 15 (Drosophila)	4	80311
GC0XM048819_at	WDR45	WD repeat domain 45	4	11152
GC0XM077334_at	CYSLTR1	cysteinyl leukotriene receptor 1	4	10800
GC0XM106763_at	TSC22D3	TSC22 domain family, member 3	4	1831
GC0XM118804_at	RPL39	ribosomal protein L39	4	6170
GC0XM131339_at	MBNL3	muscleblind-like 3 (Drosophila)	4	55796
GC0XM133731_at	FAM122B	family with sequence similarity 122B	4	159090
GC0XM142543_at	SLITRK4	SLIT and NTRK-like family, member 4	4	139065
GC0XM152826_at	ARHGAP4	Rho GTPase activating protein 4	4	393
GC0XM152847_at	ARD1A	ARD1 homolog A, N-acetyltransferase (S. cerevisiae)	4	8260
GC0XP001671_at	SFRS17A	splicing factor, arginine/serine-rich 17A	4	8227
GC0XP007147_at	STS	steroid sulfatase (microsomal), isozyme S	4	412
GC0XP016874_at	REPS2	RALBP1 associated Eps domain containing 2	4	9185
GC0XP023982_at	EIF2S3	eukaryotic translation initiation factor 2, subunit 3 gamma, 52kDa	4	1968
GC0XP038545_at	MID1IP1	MID1 interacting protein 1 (gastrulation specific G12 homolog (zebrafish))	4	58526
GC0XP041433_at	GPR34	G protein-coupled receptor 34	4	2857
GC0XP047305_at	ARAF	v-raf murine sarcoma 3611 viral oncogene homolog	4	369
GC0XP069270_at	IGBP1	immunoglobulin (CD79A) binding protein 1	4	3476
GC0XP118486_at	SLC25A5	solute carrier family 25 (mitochondrial carrier; adenine nucleotide translocator), member 5	4	292
GC0XP150315_at	VMA21	VMA21 vacuolar H+-ATPase homolog (S. cerevisiae)	4	203547
GC10M028382_at	MPP7	membrane protein, palmitoylated 7 (MAGUK p55 subfamily member 7)	4	143098
GC10M043009_at	RASGEF1A	RasGEF domain family, member 1A	4	221002
GC10M050393_at	PGBD3	piggyBac transposable element derived 3	4	267004
GC10M069713_at	PBLD	phenazine biosynthesis-like protein domain containing	4	64081
GC10M080813_at	ZCCHC24	zinc finger, CCHC domain containing 24	4	219654
GC10M099107_at	RRP12	ribosomal RNA processing 12 homolog (S. cerevisiae)	4	23223
GC10M102237_at	SEC31B	SEC31 homolog B (S. cerevisiae)	4	25956
GC10M105632_at	OBFC1	oligonucleotide/oligosaccharide-binding fold containing 1	4	79991
GC10M112618_at	LOC282997	hypothetical protein LOC282997	4	282997
GC10M119841_at	C10orf84	chromosome 10 open reading frame 84	4	63877
GC10M120785_at	EIF3A	eukaryotic translation initiation factor 3, subunit A	4	8661
GC10M124740_at	IKZF5	IKAROS family zinc finger 5 (Pegasus)	4	64376
GC10P005444_at	NET1	neuroepithelial cell transforming 1	4	10276
GC10P011905_at	C10orf47	chromosome 10 open reading frame 47	4	254427
GC10P012431_at	CAMK1D	calcium/calmodulin-dependent protein kinase ID	4	57118
GC10P035576_at	CCNY	cyclin Y	4	219771
GC10P070609_at	SUPV3L1	suppressor of var1, 3-like 1 (S. cerevisiae)	4	6832
GC10P072826_at	CDH23	cadherin-like 23	4	64072
GC10P075427_at	VCL	vinculin	4	7414
GC10P075580_at	ADK	adenosine kinase	4	132
GC10P076256_at	MYST4	MYST histone acetyltransferase (monocytic leukemia) 4	4	23522
GC10P076887_at	C10orf11	chromosome 10 open reading frame 11	4	83938
GC10P079463_at	RPS24	ribosomal protein S24	4	6229
GC10P089613_at	PTEN	phosphatase and tensin homolog	4	5728
GC10P099464_at	MARVELD1	MARVEL domain containing 1	4	83742
GC10P111957_at	MXI1	MAX interactor 1	4	4601
GC10P112618_at	PDCD4	programmed cell death 4 (neoplastic transformation inhibitor)	4	27250
GC10P120957_at	GRK5	G protein-coupled receptor kinase 5	4	2869
GC10P131155_at	MGMT	O-6-methylguanine-DNA methyltransferase	4	4255
GC10U900364_at	LOC283070	hypothetical LOC283070	4	283070
GC11M000395_at	SIGIRR	single immunoglobulin and toll-interleukin 1 receptor (TIR) domain	4	59307
GC11M002281_at	C11orf21	chromosome 11 open reading frame 21	4	29125
GC11M002861_at	CDKN1C	cyclin-dependent kinase inhibitor 1C (p57, Kip2)	4	1028
GC11M006588_at	TAF10	TAF10 RNA polymerase II, TATA box binding protein (TBP)-associated factor, 30kDa	4	6881
GC11M010489_at	RNF141	ring finger protein 141	4	50862
GC11M010553_at	MRVI1	murine retrovirus integration site 1 homolog	4	10335
GC11M058733_at	MPEG1	macrophage expressed 1	4	219972
GC11M059695_at	MS4A6A	membrane-spanning 4-domains, subfamily A, member 6A	4	64231
GC11M062083_at	EEF1G	eukaryotic translation elongation factor 1 gamma	4	1937
GC11M062316_at	NXF1	nuclear RNA export factor 1	4	10482
GC11M063100_at	PLA2G16	phospholipase A2, group XVI	4	11145
GC11M064250_at	RASGRP2	RAS guanyl releasing protein 2 (calcium and DAG-regulated)	4	10235
GC11M064290_at	SF1	splicing factor 1	4	7536
GC11M064434_at	ATG2A	ATG2 autophagy related 2 homolog A (S. cerevisiae)	4	23130
GC11M064900_at	SLC25A45	solute carrier family 25, member 45	4	283130
GC11M065540_at	CATSPER1	cation channel, sperm associated 1	4	117144
GC11M071499_at	C11orf51	chromosome 11 open reading frame 51	4	25906
GC11M116220_at	QSK	serine/threonine-protein kinase QSK	4	23387
GC11M116661_at	BACE1	beta-site APP-cleaving enzyme 1	4	23621
GC11M117212_at	FXYD6	FXYD domain containing ion transport regulator 6	4	53826
GC11M117570_at	AMICA1	adhesion molecule, interacts with CXADR antigen 1	4	120425
GC11M117604_at	MPZL3	myelin protein zero-like 3	4	196264
GC11M117630_at	MPZL2	myelin protein zero-like 2	4	10205
GC11M129603_at	ZBTB44	zinc finger and BTB domain containing 44	4	29068
GC11P001824_at	TNNI2	troponin I type 2 (skeletal, fast)	4	7136
GC11P002280_at	TSPAN32	tetraspanin 32	4	10077
GC11P002422_at	KCNQ1	potassium voltage-gated channel, KQT-like subfamily, member 1	4	3784
GC11P012088_at	MICAL2	microtubule associated monoxygenase, calponin and LIM domain containing 2	4	9645
GC11P012272_at	MICALCL	MICAL C-terminal like	4	84953
GC11P016717_at	C11orf58	chromosome 11 open reading frame 58	4	10944
GC11P032564_at	EIF3M	eukaryotic translation initiation factor 3, subunit M	4	10480
GC11P058104_at	ZFP91	zinc finger protein 91 homolog (mouse)	4	80829
GC11P063031_at	LGALS12	lectin, galactoside-binding, soluble, 12	4	85329
GC11P063754_at	DNAJC4	DnaJ (Hsp40) homolog, subfamily C, member 4	4	3338
GC11P063866_at	CCDC88B	coiled-coil domain containing 88B	4	283234
GC11P065094_at	SSSCA1	Sjogren syndrome/scleroderma autoantigen 1	4	10534
GC11P065415_at	CCDC85B	coiled-coil domain containing 85B	4	11007
GC11P066790_at	ADRBK1	adrenergic, beta, receptor kinase 1	4	156
GC11P066929_at	TBC1D10C	TBC1 domain family, member 10C	4	374403
GC11P067107_at	GSTP1	glutathione S-transferase pi 1	4	2950
GC11P082291_at	C11orf82	chromosome 11 open reading frame 82	4	220042
GC11P111255_at	C11orf1	chromosome 11 open reading frame 1	4	64776
GC11P113435_at	ZBTB16	zinc finger and BTB domain containing 16	4	7704
GC11P117777_at	ATP5L	ATP synthase, H+ transporting, mitochondrial F0 complex, subunit G	4	10632
GC11P120828_at	SORL1	sortilin-related receptor, L(DLR class) A repeats-containing	4	6653
GC11P122903_at	GRAMD1B	GRAM domain containing 1B	4	57476
GC11P124114_at	NRGN	neurogranin (protein kinase C substrate, RC3)	4	4900
GC11P129445_at	APLP2	amyloid beta (A4) precursor-like protein 2	4	334
GC12M001771_at	CACNA2D4	calcium channel, voltage-dependent, alpha 2/delta subunit 4	4	93589
GC12M006617_at	ACRBP	acrosin binding protein	4	84519
GC12M010161_at	CLEC7A	C-type lectin domain family 7, member A	4	64581
GC12M012375_at	MANSC1	MANSC domain containing 1	4	54682
GC12M014548_at	PLBD1	phospholipase B domain containing 1	4	79887
GC12M021679_at	LDHB	lactate dehydrogenase B	4	3945
GC12M032834_at	PKP2	plakophilin 2	4	5318
GC12M052345_at	ATP5G2	ATP synthase, H+ transporting, mitochondrial F0 complex, subunit C2 (subunit 9)	4	517
GC12M052972_at	NFE2	nuclear factor (erythroid-derived 2), 45kDa	4	4778
GC12M055392_at	NACA	nascent polypeptide-associated complex alpha subunit	4	4666
GC12M094869_at	HAL	histidine ammonia-lyase	4	3034
GC12M115961_at	TESC	tescalcin	4	54997
GC12M122270_at	CDK2AP1	cyclin-dependent kinase 2 associated protein 1	4	8099
GC12P006769_at	CD4	CD4 molecule	4	920
GC12P025096_at	LRMP	lymphoid-restricted membrane protein	4	4033
GC12P032546_at	FGD4	FYVE, RhoGEF and PH domain containing 4	4	121512
GC12P049729_at	LETMD1	LETM1 domain containing 1	4	25875
GC12P049918_at	DAZAP2	DAZ associated protein 2	4	9802
GC12P050687_at	GRASP	GRP1 (general receptor for phosphoinositides 1)-associated scaffold protein	4	160622
GC12P051686_at	EIF4B	eukaryotic translation initiation factor 4B	4	1975
GC12P051975_at	PFDN5	prefoldin subunit 5	4	5204
GC12P052132_at	PCBP2	poly(rC) binding protein 2	4	5094
GC12P055202_at	RBMS2	RNA binding motif, single stranded interacting protein 2	4	5939
GC12P074160_at	GLIPR1	GLI pathogenesis-related 1	4	11010
GC12P092274_at	NUDT4	nudix (nucleoside diphosphate linked moiety X)-type motif 4	4	11163
GC12P097489_at	SLC25A3	solute carrier family 25 (mitochondrial carrier; phosphate carrier), member 3	4	5250
GC12P100593_at	CHPT1	choline phosphotransferase 1	4	56994
GC12P110328_at	SH2B3	SH2B adaptor protein 3	4	10019
GC12P111692_at	RPH3A	rabphilin 3A homolog (mouse)	4	22895
GC12P115455_at	NCRNA00173	non-protein coding RNA 173	4	400077
GC12P120789_at	PSMD9	proteasome (prosome, macropain) 26S subunit, non-ATPase, 9	4	5715
GC12P122030_at	ARL6IP4	ADP-ribosylation-like factor 6 interacting protein 4	4	51329
GC12P129963_at	GPR133	G protein-coupled receptor 133	4	283383
GC12P130945_at	ULK1	unc-51-like kinase 1 (C. elegans)	4	8408
GC12P131578_at	FBRSL1	fibrosin-like 1	4	57666
GC12P132073_at	ZNF26	zinc finger protein 26	4	7574
GC13M027475_at	FLT3	fms-related tyrosine kinase 3	4	2322
GC13M029930_at	HMGB1	high-mobility group box 1	4	3146
GC13M040028_at	FOXO1	forkhead box O1	4	2308
GC13M073158_at	KLF12	Kruppel-like factor 12	4	11278
GC13M074998_at	COMMD6	COMM domain containing 6	4	170622
GC13M105992_at	ARGLU1	arginine and glutamate rich 1	4	55082
GC13M109204_at	IRS2	insulin receptor substrate 2	4	8660
GC13M110092_at	CARS2	cysteinyl-tRNA synthetase 2, mitochondrial (putative)	4	79587
GC13P019431_at	ZMYM2	zinc finger, MYM-type 2	4	7750
GC13P027093_at	POLR1D	polymerase (RNA) I polypeptide D, 16kDa	4	51082
GC13P027646_at	PAN3	PAN3 poly(A) specific ribonuclease subunit homolog (S. cerevisiae)	4	255967
GC13P048720_at	CDADC1	cytidine and dCMP deaminase domain containing 1	4	81602
GC13P110163_at	ING1	inhibitor of growth family, member 1	4	3621
GC13P113287_at	TFDP1	transcription factor Dp-1	4	7027
GC14M019849_at	CCNB1IP1	cyclin B1 interacting protein 1	4	57820
GC14M038936_at	FBXO33	F-box protein 33	4	254170
GC14M051968_at	TXNDC16	thioredoxin domain containing 16	4	57544
GC14M054902_at	KIAA0831	KIAA0831	4	22863
GC14M057946_at	TIMM9	translocase of inner mitochondrial membrane 9 homolog (yeast)	4	26520
GC14M064024_at	ZBTB25	zinc finger and BTB domain containing 25	4	7597
GC14M088692_at	FOXN3	forkhead box N3	4	1112
GC14M092473_at	ITPK1	inositol 1,3,4-triphosphate 5/6 kinase	4	3705
GC14M103093_at	BAG5	BCL2-associated athanogene 5	4	9529
GC14M103448_at	C14orf2	chromosome 14 open reading frame 2	4	9556
GC14P019993_at	APEX1	APEX nuclease (multifunctional DNA repair enzyme) 1	4	328
GC14P020319_at	RNASE6	ribonuclease, RNase A family, k6	4	6039
GC14P020460_at	LOC643332	similar to Nonsecretory ribonuclease precursor (Ribonuclease US) (Eosinophil-derived neurotoxin) (RNase UpI-2) (Ribonuclease 2) (RNase 2)	4	643332
GC14P020493_at	RNASE2	ribonuclease, RNase A family, 2 (liver, eosinophil-derived neurotoxin)	4	6036
GC14P020825_at	RPGRIP1	retinitis pigmentosa GTPase regulator interacting protein 1	4	57096
GC14P038714_at	PNN	pinin, desmosome associated protein	4	5411
GC14P055654_at	PELI2	pellino homolog 2 (Drosophila)	4	57161
GC14P069263_at	SFRS5	splicing factor, arginine/serine-rich 5	4	6430
GC14P074299_at	YLPM1	YLP motif containing 1	4	56252
GC14P074815_at	FOS	v-fos FBJ murine osteosarcoma viral oncogene homolog	4	2353
GC14P074964_at	JDP2	Jun dimerization protein 2	4	122953
GC14P087921_at	SPATA7	spermatogenesis associated 7	4	55812
GC14P092049_at	RIN3	Ras and Rab interactor 3	4	79890
GC14P099774_at	YY1	YY1 transcription factor	4	7528
GC14P104261_at	ADSSL1	adenylosuccinate synthase like 1	4	122622
GC14P104464_at	PLD4	phospholipase D family, member 4	4	122618
GC14P104957_at	MTA1	metastasis associated 1	4	9112
GC14U900323_at	LOC145474	hypothetical protein LOC145474	4	145474
GC15M038367_at	PLCB2	phospholipase C, beta 2	4	5330
GC15M047207_at	COPS2	COP9 constitutive photomorphogenic homolog subunit 2 (Arabidopsis)	4	9318
GC15M050661_at	KIAA1370	KIAA1370	4	56204
GC15M054170_at	RFX7	regulatory factor X, 7	4	64864
GC15M064578_at	RPL4	ribosomal protein L4	4	6124
GC15M068129_at	TLE3	transducin-like enhancer of split 3 (E(sp1) homolog, Drosophila)	4	7090
GC15M073435_at	MAN2C1	mannosidase, alpha, class 2C, member 1	4	4123
GC15M089310_at	PRC1	protein regulator of cytokinesis 1	4	9055
GC15P038551_at	CHST14	carbohydrate (N-acetylgalactosamine 4-0) sulfotransferase 14	4	113189
GC15P040354_at	GANC	glucosidase, alpha; neutral C	4	2595
GC15P078003_at	C15orf37	chromosome 15 open reading frame 37	4	283687
GC15P083092_at	ZNF592	zinc finger protein 592	4	9640
GC15P089247_at	MAN2A2	mannosidase, alpha, class 2A, member 2	4	4122
GC16M001768_at	SPSB3	splA/ryanodine receptor domain and SOCS box containing 3	4	90864
GC16M004787_at	ROGDI	rogdi homolog (Drosophila)	4	79641
GC16M008857_at	CARHSP1	calcium regulated heat stable protein 1, 24kDa	4	23589
GC16M011681_at	TXNDC11	thioredoxin domain containing 11	4	51061
GC16M016151_at	ABCC6	ATP-binding cassette, sub-family C (CFTR/MRP), member 6	4	368
GC16M028510_at	SULT1A2	sulfotransferase family, cytosolic, 1A, phenol-preferring, member 2	4	6799
GC16M065984_at	TPPP3	tubulin polymerization-promoting protein family member 3	4	51673
GC16M065985_at	ZDHHC1	zinc finger, DHHC-type containing 1	4	29800
GC16M066578_at	DPEP2	dipeptidase 2	4	64174
GC16M071374_at	ZFHX3	zinc finger homeobox 3	4	463
GC16M083156_at	COTL1	coactosin-like 1 (Dictyostelium)	4	23406
GC16M085920_at	FBXO31	F-box protein 31	4	79791
GC16M086298_at	KLHDC4	kelch domain containing 4	4	54758
GC16M087271_at	SNAI3	snail homolog 3 (Drosophila)	4	333929
GC16M087290_at	RNF166	ring finger protein 166	4	115992
GC16M087403_at	APRT	adenine phosphoribosyltransferase	4	353
GC16M087468_at	CBFA2T3	core-binding factor, runt domain, alpha subunit 2; translocated to, 3	4	863
GC16P000387_at	NME4	non-metastatic cells 4, protein expressed in	4	4833
GC16P000391_at	DECR2	2,4-dienoyl CoA reductase 2, peroxisomal	4	26063
GC16P002742_at	SRRM2	serine/arginine repetitive matrix 2	4	23524
GC16P021872_at	UQCRC2	ubiquinol-cytochrome c reductase core protein II	4	7385
GC16P023755_at	PRKCB	protein kinase C, beta	4	5579
GC16P029581_at	SPN	sialophorin	4	6693
GC16P030103_at	CORO1A	coronin, actin binding protein, 1A	4	11151
GC16P031168_at	ITGAM	integrin, alpha M (complement component 3 receptor 3 subunit)	4	3684
GC16P048791_at	PAPD5	PAP associated domain containing 5	4	64282
GC16P065172_at	CMTM2	CKLF-like MARVEL transmembrane domain containing 2	4	146225
GC16P065580_at	CES8	carboxylesterase 8 (putative)	4	283848
GC16P076691_at	WWOX	WW domain containing oxidoreductase	4	51741
GC16P082708_at	LOC729887	hypothetical protein LOC729887	4	729887
GC16P084390_at	COX4I1	cytochrome c oxidase subunit IV isoform 1	4	1327
GC17M000294_at	FAM101B	family with sequence similarity 101, member B	4	359845
GC17M001345_at	INPP5K	inositol polyphosphate-5-phosphatase K	4	51763
GC17M003746_at	P2RX1	purinergic receptor P2X, ligand-gated ion channel, 1	4	5023
GC17M003854_at	ZZEF1	zinc finger, ZZ-type with EF-hand domain 1	4	23140
GC17M005354_at	NLRP1	NLR family, pyrin domain containing 1	4	22861
GC17M006919_at	CLEC10A	C-type lectin domain family 10, member A	4	10462
GC17M006945_at	ASGR2	asialoglycoprotein receptor 2	4	433
GC17M007087_at	DULLARD	dullard homolog (Xenopus laevis)	4	23399
GC17M007233_at	PLSCR3	phospholipid scramblase 3	4	57048
GC17M007470_at	SAT2	spermidine/spermine N1-acetyltransferase family member 2	4	112483
GC17M007984_at	PER1	period homolog 1 (Drosophila)	4	5187
GC17M015820_at	ZSWIM7	zinc finger, SWIM-type containing 7	4	125150
GC17M017090_at	COPS3	COP9 constitutive photomorphogenic homolog subunit 3 (Arabidopsis)	4	8533
GC17M023680_at	IFT20	intraflagellar transport 20 homolog (Chlamydomonas)	4	90410
GC17M024977_at	SSH2	slingshot homolog 2 (Drosophila)	4	85464
GC17M030279_at	CCT6B	chaperonin containing TCP1, subunit 6B (zeta 2)	4	10693
GC17M037164_at	JUP	junction plakoglobin	4	3728
GC17M037519_at	KAT2A	K(lysine) acetyltransferase 2A	4	2648
GC17M040863_at	SH3D20	SH3 domain containing 20	4	201175
GC17M043239_at	OSBPL7	oxysterol binding protein-like 7	4	114881
GC17M043459_at	COPZ2	coatomer protein complex, subunit zeta 2	4	51226
GC17M053702_at	MPO	myeloperoxidase	4	4353
GC17M059127_at	LIMD2	LIM domain containing 2	4	80774
GC17M070029_at	CD300LB	CD300 molecule-like family member b	4	124599
GC17M073619_at	TMC6	transmembrane channel-like 6	4	11322
GC17M077610_at	DUS1L	dihydrouridine synthase 1-like (S. cerevisiae)	4	64118
GC17M078165_at	WDR45L	WDR45-like	4	56270
GC17M078208_at	RAB40B	RAB40B, member RAS oncogene family	4	10966
GC17P002188_at	SGSM2	small G protein signaling modulator 2	4	9905
GC17P015843_at	TTC19	tetratricopeptide repeat domain 19	4	54902
GC17P016061_at	PIGL	phosphatidylinositol glycan anchor biosynthesis, class L	4	9487
GC17P019221_at	MAPK7	mitogen-activated protein kinase 7	4	5598
GC17P026742_at	RAB11FIP4	RAB11 family interacting protein 4 (class II)	4	84440
GC17P038403_at	RPL27	ribosomal protein L27	4	6155
GC17P044327_at	ATP5G1	ATP synthase, H+ transporting, mitochondrial F0 complex, subunit C1 (subunit 9)	4	516
GC17P045527_at	PDK2	pyruvate dehydrogenase kinase, isozyme 2	4	5164
GC17P045980_at	SPATA20	spermatogenesis associated 20	4	64847
GC17P052266_at	DGKE	diacylglycerol kinase, epsilon 64kDa	4	8526
GC17P053516_at	DYNLL2	dynein, light chain, LC8-type 2	4	140735
GC17P059934_at	CCDC45	coiled-coil domain containing 45	4	90799
GC17P063767_at	ARSG	arylsulfatase G	4	22901
GC17P064922_at	MAP2K6	mitogen-activated protein kinase kinase 6	4	5608
GC17P069711_at	RPL38	ribosomal protein L38	4	6169
GC17P070178_at	RAB37	RAB37, member RAS oncogene family	4	326624
GC17P070256_at	SLC9A3R1	solute carrier family 9 (sodium/hydrogen exchanger), member 3 regulator 1	4	9368
GC17P070595_at	SLC16A5	solute carrier family 16, member 5 (monocarboxylic acid transporter 6)	4	9121
GC17P071096_at	MYO15B	myosin XVB pseudogene	4	80022
GC17P072648_at	SEC14L1	SEC14-like 1 (S. cerevisiae)	4	6397
GC17P073639_at	TMC8	transmembrane channel-like 8	4	147138
GC17P076828_at	C17orf89	chromosome 17 open reading frame 89	4	284184
GC17P077280_at	MRPL12	mitochondrial ribosomal protein L12	4	6182
GC17P077800_at	ENSG00000184551	NA	4	NA
GC18M012319_at	AFG3L2	AFG3 ATPase family gene 3-like 2 (yeast)	4	10939
GC18M042646_at	PIAS2	protein inhibitor of activated STAT, 2	4	9063
GC18P040535_at	SETBP1	SET binding protein 1	4	26040
GC18P058005_at	KIAA1468	KIAA1468	4	57614
GC18P075895_at	C18orf22	chromosome 18 open reading frame 22	4	79863
GC19M002272_at	LSM7	LSM7 homolog, U6 small nuclear RNA associated (S. cerevisiae)	4	51690
GC19M002376_at	TIMM13	translocase of inner mitochondrial membrane 13 homolog (yeast)	4	26517
GC19M007067_at	INSR	insulin receptor	4	3643
GC19M010091_at	EIF3G	eukaryotic translation initiation factor 3, subunit G	4	8666
GC19M010305_at	ICAM3	intercellular adhesion molecule 3	4	3385
GC19M012640_at	C19orf56	chromosome 19 open reading frame 56	4	51398
GC19M012703_at	C19orf43	chromosome 19 open reading frame 43	4	79002
GC19M012768_at	PRDX2	peroxiredoxin 2	4	7001
GC19M013077_at	TRMT1	TRM1 tRNA methyltransferase 1 homolog (S. cerevisiae)	4	55621
GC19M014063_at	PRKACA	protein kinase, cAMP-dependent, catalytic, alpha	4	5566
GC19M014121_at	LPHN1	latrophilin 1	4	22859
GC19M014591_at	EMR3	egf-like module containing, mucin-like, hormone receptor-like 3	4	84658
GC19M015325_at	AKAP8	A kinase (PRKA) anchor protein 8	4	10270
GC19M015353_at	AKAP8L	A kinase (PRKA) anchor protein 8-like	4	26993
GC19M018254_at	JUND	jun D proto-oncogene	4	3727
GC19M019597_at	LPAR2	lysophosphatidic acid receptor 2	4	9170
GC19M034390_at	UQCRFS1	ubiquinol-cytochrome c reductase, Rieske iron-sulfur polypeptide 1	4	7386
GC19M040926_at	U2AF1L4	U2 small nuclear RNA auxiliary factor 1-like 4	4	199746
GC19M043770_at	MAP4K1	mitogen-activated protein kinase kinase kinase kinase 1	4	11184
GC19M044097_at	SARS2	seryl-tRNA synthetase 2, mitochondrial	4	54938
GC19M044510_at	GMFG	glia maturation factor, gamma	4	9535
GC19M044615_at	RPS16	ribosomal protein S16	4	6217
GC19M045016_at	FBL	fibrillarin	4	2091
GC19M050360_at	TRAPPC6A	trafficking protein particle complex 6A	4	79090
GC19M050882_at	SNRPD2	small nuclear ribonucleoprotein D2 polypeptide 16.5kDa	4	6633
GC19M053810_at	RPL18	ribosomal protein L18	4	6141
GC19M057352_at	ZNF836	zinc finger protein 836	4	162962
GC19M060824_at	ZNF784	zinc finger protein 784	4	147808
GC19M063548_at	A1BG	alpha-1-B glycoprotein	4	1
GC19P000804_at	ELANE	elastase, neutrophil expressed	4	1991
GC19P000811_at	CFD	complement factor D (adipsin)	4	1675
GC19P001156_at	STK11	serine/threonine kinase 11	4	6794
GC19P001192_at	ATP5D	ATP synthase, H+ transporting, mitochondrial F1 complex, delta subunit	4	513
GC19P001334_at	NDUFS7	NADH dehydrogenase (ubiquinone) Fe-S protein 7, 20kDa (NADH-coenzyme Q reductase)	4	374291
GC19P001393_at	RPS15	ribosomal protein S15	4	6209
GC19P003130_at	S1PR4	sphingosine-1-phosphate receptor 4	4	8698
GC19P011319_at	hCG_29977	coiled-coil domain-containing-like	4	126075
GC19P016296_at	KLF2	Kruppel-like factor 2 (lung)	4	10365
GC19P017837_at	SNORA68	small nucleolar RNA, H/ACA box 68	4	26780
GC19P017979_at	ARRDC2	arrestin domain containing 2	4	27106
GC19P018891_at	DDX49	DEAD (Asp-Glu-Ala-Asp) box polypeptide 49	4	54555
GC19P038377_at	LRP3	low density lipoprotein receptor-related protein 3	4	4037
GC19P038979_at	KCTD15	potassium channel tetramerisation domain containing 15	4	79047
GC19P039359_at	LSM14A	LSM14A, SCD6 homolog A (S. cerevisiae)	4	26065
GC19P040337_at	FXYD5	FXYD domain containing ion transport regulator 5	4	53827
GC19P040797_at	HAUS5	HAUS augmin-like complex, subunit 5	4	23354
GC19P043803_at	EIF3K	eukaryotic translation initiation factor 3, subunit K	4	27335
GC19P046549_at	TMEM91	transmembrane protein 91	4	641649
GC19P050663_at	FOSB	FBJ murine osteosarcoma viral oncogene homolog B	4	2354
GC19P052934_at	GLTSCR2	glioma tumor suppressor candidate region gene 2	4	29997
GC19P054767_at	RPS11	ribosomal protein S11	4	6205
GC19P055919_at	CLEC11A	C-type lectin domain family 11, member A	4	6320
GC19P058716_at	ZNF331	zinc finger protein 331	4	55422
GC19P059396_at	RPS9	ribosomal protein S9	4	6203
GC19P059651_at	LENG8	leukocyte receptor cluster (LRC) member 8	4	114823
GC19P060681_at	ZNF628	zinc finger protein 628	4	89887
GC19P060849_at	ZNF581	zinc finger protein 581	4	51545
GC19P062484_at	ZNF460	zinc finger protein 460	4	10794
GC19P062595_at	ZNF548	zinc finger protein 548	4	147694
GC20M002764_at	FAM113A	family with sequence similarity 113, member A	4	64773
GC20M003682_at	C20orf27	chromosome 20 open reading frame 27	4	54976
GC20M007908_at	TMX4	thioredoxin-related transmembrane protein 4	4	56255
GC20M023562_at	CST3	cystatin C	4	1471
GC20M032331_at	AHCY	S-adenosylhomocysteine hydrolase	4	191
GC20M045719_at	SULF2	sulfatase 2	4	55959
GC20M062062_at	ZNF512B	zinc finger protein 512B	4	57473
GC20P008061_at	PLCB1	phospholipase C, beta 1 (phosphoinositide-specific)	4	23236
GC20P023279_at	NXT1	NTF2-like export factor 1	4	29107
GC20P023291_at	GZF1	GDNF-inducible zinc finger protein 1	4	64412
GC20P029656_at	ID1	inhibitor of DNA binding 1, dominant negative helix-loop-helix protein	4	3397
GC20P033824_at	PHF20	PHD finger protein 20	4	51230
GC20P041519_at	SFRS6	splicing factor, arginine/serine-rich 6	4	6431
GC20P043896_at	SNX21	sorting nexin family member 21	4	90203
GC20P043997_at	PCIF1	PDX1 C-terminal inhibiting factor 1	4	63935
GC20P056700_at	NPEPL1	aminopeptidase-like 1	4	79716
GC20P058065_at	C20orf197	chromosome 20 open reading frame 197	4	284756
GC20P061039_at	C20orf11	chromosome 20 open reading frame 11	4	54994
GC21M027215_at	ADAMTS5	ADAM metallopeptidase with thrombospondin type 1 motif, 5	4	11096
GC21M043386_at	U2AF1	U2 small nuclear RNA auxiliary factor 1	4	7307
GC21M043659_at	SIK1	salt-inducible kinase 1	4	150094
GC21M045013_at	UBE2G2	ubiquitin-conjugating enzyme E2G 2 (UBC7 homolog, yeast)	4	7327
GC21M045759_at	SLC19A1	solute carrier family 19 (folate transporter), member 1	4	6573
GC21P032687_at	C21orf119	chromosome 21 open reading frame 119	4	84996
GC21P045649_at	COL18A1	collagen, type XVIII, alpha 1	4	80781
GC21P046569_at	PCNT	pericentrin	4	5116
GC22M020598_at	PPM1F	protein phosphatase 1F (PP2C domain containing)	4	9647
GC22M024077_at	LRP5L	low density lipoprotein receptor-related protein 5-like	4	91355
GC22M028275_at	NIPSNAP1	nipsnap homolog 1 (C. elegans)	4	8508
GC22M029054_at	SF3A1	splicing factor 3a, subunit 1, 120kDa	4	10291
GC22M030007_at	PIK3IP1	phosphoinositide-3-kinase interacting protein 1	4	113791
GC22M036189_at	MFNG	MFNG O-fucosylpeptide 3-beta-N-acetylglucosaminyltransferase	4	4242
GC22M036290_at	LGALS2	lectin, galactoside-binding, soluble, 2	4	3957
GC22M040394_at	NHP2L1	NHP2 non-histone chromosome protein 2-like 1 (S. cerevisiae)	4	4809
GC22M049092_at	FAM116B	family with sequence similarity 116, member B	4	414918
GC22P019649_at	AIFM3	apoptosis-inducing factor, mitochondrion-associated, 3	4	150209
GC22P024889_at	SEZ6L	seizure related 6 homolog (mouse)-like	4	23544
GC22P026718_at	LOC284900	hypothetical LOC284900	4	284900
GC22P036575_at	EIF3L	eukaryotic translation initiation factor 3, subunit L	4	51386
GC22P037402_at	TOMM22	translocase of outer mitochondrial membrane 22 homolog (yeast)	4	56993
GC22P038070_at	SYNGR1	synaptogyrin 1	4	9145
GC22P044059_at	UPK3A	uroplakin 3A	4	7380
GCMTP007587_at	MT-CO2	mitochondrially encoded cytochrome c oxidase II	4	4513
GC01M003675_at	KIAA0495	KIAA0495	5	57212
GC01M006215_at	ICMT	isoprenylcysteine carboxyl methyltransferase	5	23463
GC01M008346_at	RERE	arginine-glutamic acid dipeptide (RE) repeats	5	473
GC01M044789_at	TMEM53	transmembrane protein 53	5	79639
GC01M052199_at	TXNDC12	thioredoxin domain containing 12 (endoplasmic reticulum)	5	51060
GC01M053946_at	TMEM48	transmembrane protein 48	5	55706
GC01M054030_at	YIPF1	Yip1 domain family, member 1	5	54432
GC01M054159_at	HSPB11	heat shock protein family B (small), member 11	5	51668
GC01M070323_at	LRRC40	leucine rich repeat containing 40	5	55631
GC01M085891_at	ZNHIT6	zinc finger, HIT type 6	5	54680
GC01M095161_at	ALG14	asparagine-linked glycosylation 14 homolog (S. cerevisiae)	5	199857
GC01M108903_at	C1orf59	chromosome 1 open reading frame 59	5	113802
GC01M109653_at	SORT1	sortilin 1	5	6272
GC01M144167_at	POLR3GL	polymerase (RNA) III (DNA directed) polypeptide G (32kD)-like	5	84265
GC01M149204_at	LASS2	LAG1 homolog, ceramide synthase 2	5	29956
GC01M153432_at	THBS3	thrombospondin 3	5	7059
GC01M170677_at	PIGC	phosphatidylinositol glycan anchor biosynthesis, class C	5	5279
GC01M180617_at	GLUL	glutamate-ammonia ligase (glutamine synthetase)	5	2752
GC01M203948_at	NUCKS1	nuclear casein kinase and cyclin-dependent kinase substrate 1	5	64710
GC01M218297_at	BPNT1	3'(2'), 5'-bisphosphate nucleotidase 1	5	10380
GC01M222482_at	NVL	nuclear VCP-like	5	4931
GC01M224615_at	PARP1	poly (ADP-ribose) polymerase 1	5	142
GC01M227523_at	C1orf96	chromosome 1 open reading frame 96	5	126731
GC01M227718_at	ABCB10	ATP-binding cassette, sub-family B (MDR/TAP), member 10	5	23456
GC01M229221_at	FAM89A	family with sequence similarity 89, member A	5	375061
GC01P002551_at	C1orf93	chromosome 1 open reading frame 93	5	127281
GC01P020832_at	PINK1	PTEN induced putative kinase 1	5	65018
GC01P024702_at	RCAN3	RCAN family member 3	5	11123
GC01P025742_at	LDLRAP1	low density lipoprotein receptor adaptor protein 1	5	26119
GC01P026310_at	PDIK1L	PDLIM1 interacting kinase 1 like	5	149420
GC01P028435_at	ATPIF1	ATPase inhibitory factor 1	5	93974
GC01P031542_at	ZCCHC17	zinc finger, CCHC domain containing 17	5	51538
GC01P040715_at	ZNF642	zinc finger protein 642	5	339559
GC01P045205_at	UROD	uroporphyrinogen decarboxylase	5	7389
GC01P045925_at	TMEM69	transmembrane protein 69	5	51249
GC01P052964_at	ZYG11B	zyg-11 homolog B (C. elegans)	5	79699
GC01P063605_at	ALG6	asparagine-linked glycosylation 6, alpha-1,3-glucosyltransferase homolog (S. cerevisiae)	5	29929
GC01P070532_at	HHLA3	HERV-H LTR-associating 3	5	11147
GC01P091678_at	CDC7	cell division cycle 7 homolog (S. cerevisiae)	5	8317
GC01P094596_at	ABCD3	ATP-binding cassette, sub-family D (ALD), member 3	5	5825
GC01P100088_at	AGL	amylo-1, 6-glucosidase, 4-alpha-glucanotransferase	5	178
GC01P109220_at	GPSM2	G-protein signaling modulator 2 (AGS3-like, C. elegans)	5	29899
GC01P110000_at	GSTM4	glutathione S-transferase mu 4	5	2948
GC01P144188_at	LIX1L	Lix1 homolog (mouse)-like	5	128077
GC01P144227_at	PEX11B	peroxisomal biogenesis factor 11 beta	5	8799
GC01P144287_at	PIAS3	protein inhibitor of activated STAT, 3	5	10401
GC01P153445_at	MTX1	metaxin 1	5	4580
GC01P153557_at	RUSC1	RUN and SH3 domain containing 1	5	23623
GC01P154095_at	SYT11	synaptotagmin XI	5	23208
GC01P158017_at	DUSP23	dual specificity phosphatase 23	5	54935
GC01P163866_at	MGST3	microsomal glutathione S-transferase 3	5	4259
GC01P166172_at	IQWD1	IQ motif and WD repeats 1	5	55827
GC01P211031_at	TATDN3	TatD DNase domain containing 3	5	128387
GC01P217413_at	LYPLAL1	lysophospholipase-like 1	5	127018
GC01P218334_at	IARS2	isoleucyl-tRNA synthetase 2, mitochondrial	5	55699
GC01P231152_at	C1orf57	chromosome 1 open reading frame 57	5	84284
GC01P244953_at	SCCPDH	saccharopine dehydrogenase (putative)	5	51097
GC02M027402_at	GTF3C2	general transcription factor IIIC, polypeptide 2, beta 110kDa	5	2976
GC02M032103_at	DPY30	dpy-30 homolog (C. elegans)	5	84661
GC02M040253_at	SLC8A1	solute carrier family 8 (sodium/calcium exchanger), member 1	5	6546
GC02M071190_at	MCEE	methylmalonyl CoA epimerase	5	84693
GC02M074613_at	LOXL3	lysyl oxidase-like 3	5	84695
GC02M085422_at	RETSAT	retinol saturase (all-trans-retinol 13,14-reductase)	5	54884
GC02M096877_at	ANKRD39	ankyrin repeat domain 39	5	51239
GC02M128415_at	SAP130	Sin3A-associated protein, 130kDa	5	79595
GC02M170376_at	METTL5	methyltransferase like 5	5	29081
GC02M176496_at	KIAA1715	KIAA1715	5	80856
GC02M208809_at	IDH1	isocitrate dehydrogenase 1 (NADP+), soluble	5	3417
GC02M215301_at	BARD1	BRCA1 associated RING domain 1	5	580
GC02P009514_at	CPSF3	cleavage and polyadenylation specific factor 3, 73kDa	5	51692
GC02P030523_at	LCLAT1	lysocardiolipin acyltransferase 1	5	253558
GC02P038005_at	FAM82A1	family with sequence similarity 82, member A1	5	151393
GC02P038956_at	MORN2	MORN repeat containing 2	5	729967
GC02P043913_at	DYNC2LI1	dynein, cytoplasmic 2, light intermediate chain 1	5	51626
GC02P062786_at	EHBP1	EH domain binding protein 1	5	23301
GC02P067477_at	ETAA1	Ewing tumor-associated antigen 1	5	54465
GC02P070396_at	PCYOX1	prenylcysteine oxidase 1	5	51449
GC02P071207_at	NAGK	N-acetylglucosamine kinase	5	55577
GC02P071592_at	DYSF	dysferlin, limb girdle muscular dystrophy 2B (autosomal recessive)	5	8291
GC02P073466_at	ALMS1	Alstrom syndrome 1	5	7840
GC02P085658_at	VAMP8	vesicle-associated membrane protein 8 (endobrevin)	5	8673
GC02P098465_at	INPP4A	inositol polyphosphate-4-phosphatase, type I, 107kDa	5	3631
GC02P128565_at	UGCGL1	UDP-glucose ceramide glucosyltransferase-like 1	5	56886
GC02P201462_at	NIF3L1	NIF3 NGG1 interacting factor 3-like 1 (S. pombe)	5	60491
GC02P202025_at	STRADB	STE20-related kinase adaptor beta	5	55437
GC02P210575_at	RPE	ribulose-5-phosphate-3-epimerase	5	6120
GC02P219231_at	BCS1L	BCS1-like (yeast)	5	617
GC02P238893_at	TRAF3IP1	TNF receptor-associated factor 3 interacting protein 1	5	26146
GC03M011574_at	VGLL4	vestigial like 4 (Drosophila)	5	9686
GC03M015579_at	HACL1	2-hydroxyacyl-CoA lyase 1	5	26061
GC03M033013_at	GLB1	galactosidase, beta 1	5	2720
GC03M052719_at	NEK4	NIMA (never in mitosis gene a)-related kinase 4	5	6787
GC03M069187_at	UBA3	ubiquitin-like modifier activating enzyme 3	5	9039
GC03M099780_at	CPOX	coproporphyrinogen oxidase	5	1371
GC03M134802_at	TOPBP1	topoisomerase (DNA) II binding protein 1	5	11073
GC03M150231_at	HLTF	helicase-like transcription factor	5	6596
GC03M178221_at	TBL1XR1	transducin (beta)-like 1 X-linked receptor 1	5	79718
GC03M182185_at	DNAJC19	DnaJ (Hsp40) homolog, subfamily C, member 19	5	131118
GC03M185910_at	MAGEF1	melanoma antigen family F, 1	5	64110
GC03M187990_at	RFC4	replication factor C (activator 1) 4, 37kDa	5	5984
GC03M197264_at	TFRC	transferrin receptor (p90, CD71)	5	7037
GC03P009773_at	OGG1	8-oxoguanine DNA glycosylase	5	4968
GC03P014195_at	LSM3	LSM3 homolog, U6 small nuclear RNA associated (S. cerevisiae)	5	27258
GC03P016282_at	OXNAD1	oxidoreductase NAD-binding domain containing 1	5	92106
GC03P046356_at	CCR2	chemokine (C-C motif) receptor 2	5	729230
GC03P049185_at	KLHDC8B	kelch domain containing 8B	5	200942
GC03P052464_at	NISCH	nischarin	5	11188
GC03P052716_at	SPCS1	signal peptidase complex subunit 1 homolog (S. cerevisiae)	5	28972
GC03P109791_at	DZIP3	DAZ interacting protein 3, zinc finger	5	9666
GC03P113181_at	ABHD10	abhydrolase domain containing 10	5	55347
GC03P123587_at	FAM162A	family with sequence similarity 162, member A	5	26355
GC03P130642_at	IFT122	intraflagellar transport 122 homolog (Chlamydomonas)	5	55764
GC03P133862_at	UBA5	ubiquitin-like modifier activating enzyme 5	5	79876
GC03P160003_at	MFSD1	major facilitator superfamily domain containing 1	5	64747
GC03P186012_at	VPS8	vacuolar protein sorting 8 homolog (S. cerevisiae)	5	23355
GC04M003551_at	LRPAP1	low density lipoprotein receptor-related protein associated protein 1	5	4043
GC04M056899_at	AASDH	aminoadipate-semialdehyde dehydrogenase	5	132949
GC04M074139_at	COX18	COX18 cytochrome c oxidase assembly homolog (S. cerevisiae)	5	285521
GC04M100238_at	ADH5	alcohol dehydrogenase 5 (class III), chi polypeptide	5	128
GC04M110829_at	CASP6	caspase 6, apoptosis-related cysteine peptidase	5	839
GC04M110854_at	PLA2G12A	phospholipase A2, group XIIA	5	81579
GC04M129484_at	PGRMC2	progesterone receptor membrane component 2	5	10424
GC04M140510_at	NDUFC1	NADH dehydrogenase (ubiquinone) 1, subcomplex unknown, 1, 6kDa	5	4717
GC04M164668_at	1997-02-28	membrane-associated ring finger (C3HC4) 1	5	55016
GC04M166219_at	TMEM192	transmembrane protein 192	5	201931
GC04P007029_at	TBC1D14	TBC1 domain family, member 14	5	57533
GC04P078268_at	CCNG2	cyclin G2	5	901
GC04P090252_at	TIGD2	tigger transposable element derived 2	5	166815
GC04P175441_at	KIAA1712	KIAA1712	5	80817
GC05M039141_at	FYB	FYN binding protein (FYB-120/130)	5	2533
GC05M054587_at	DHX29	DEAH (Asp-Glu-Ala-His) box polypeptide 29	5	54505
GC05M064049_at	SFRS12IP1	SFRS12-interacting protein 1	5	285672
GC05M112240_at	REEP5	receptor accessory protein 5	5	7905
GC05M114630_at	CCDC112	coiled-coil domain containing 112	5	153733
GC05M122708_at	CEP120	centrosomal protein 120kDa	5	153241
GC05M134697_at	H2AFY	H2A histone family, member Y	5	9555
GC05M140980_at	HDAC3	histone deacetylase 3	5	8841
GC05M149413_at	CSF1R	colony stimulating factor 1 receptor	5	1436
GC05M179315_at	RNF130	ring finger protein 130	5	55819
GC05P001854_at	NDUFS6	NADH dehydrogenase (ubiquinone) Fe-S protein 6, 13kDa (NADH-coenzyme Q reductase)	5	4726
GC05P014635_at	FAM105A	family with sequence similarity 105, member A	5	54491
GC05P041961_at	FBXO4	F-box protein 4	5	26272
GC05P075734_at	IQGAP2	IQ motif containing GTPase activating protein 2	5	10788
GC05P082409_at	XRCC4	X-ray repair complementing defective repair in Chinese hamster cells 4	5	7518
GC05P094039_at	ANKRD32	ankyrin repeat domain 32	5	84250
GC05P099900_at	FAM174A	family with sequence similarity 174, member A	5	345757
GC05P118816_at	HSD17B4	hydroxysteroid (17-beta) dehydrogenase 4	5	3295
GC06M004060_at	PECI	peroxisomal D3,D2-enoyl-CoA isomerase	5	10455
GC06M033773_at	C6orf125	chromosome 6 open reading frame 125	5	84300
GC06M038751_at	GLO1	glyoxalase I	5	2739
GC06M041142_at	C6orf130	chromosome 6 open reading frame 130	5	221443
GC06M052236_at	MCM3	minichromosome maintenance complex component 3	5	4172
GC06M099428_at	FBXL4	F-box and leucine-rich repeat protein 4	5	26235
GC06M107126_at	RTN4IP1	reticulon 4 interacting protein 1	5	84816
GC06M143857_at	FUCA2	fucosidase, alpha-L- 2, plasma	5	2519
GC06P007536_at	SNRNP48	small nuclear ribonucleoprotein 48kDa (U11/U12)	5	154007
GC06P034833_at	SNRPC	small nuclear ribonucleoprotein polypeptide C	5	6631
GC06P057287_at	PRIM2	primase, DNA, polypeptide 2 (58kDa)	5	5558
GC06P083959_at	RWDD2A	RWD domain containing 2A	5	112611
GC06P088089_at	C6orf162	chromosome 6 open reading frame 162	5	57150
GC06P139137_at	CCDC28A	coiled-coil domain containing 28A	5	25901
GC07M016606_at	ANKMY2	ankyrin repeat and MYND domain containing 2	5	57037
GC07M027531_at	HIBADH	3-hydroxyisobutyrate dehydrogenase	5	11112
GC07M030019_at	FKBP14	FK506 binding protein 14, 22 kDa	5	55033
GC07M073283_at	RFC2	replication factor C (activator 1) 2, 40kDa	5	5982
GC07M091954_at	PEX1	peroxisomal biogenesis factor 1	5	5189
GC07M137210_at	CREB3L2	cAMP responsive element binding protein 3-like 2	5	64764
GC07M158116_at	NCAPG2	non-SMC condensin II complex, subunit G2	5	54892
GC07P000290_at	FAM20C	family with sequence similarity 20, member C	5	56975
GC07P002274_at	CHST12	carbohydrate (chondroitin 4) sulfotransferase 12	5	55501
GC07P033136_at	BBS9	Bardet-Biedl syndrome 9	5	27241
GC07P086812_at	CROT	carnitine O-octanoyltransferase	5	54677
GC08M017958_at	ASAH1	N-acylsphingosine amidohydrolase (acid ceramidase) 1	5	427
GC08M042824_at	RNF170	ring finger protein 170	5	81790
GC08M066677_at	ARMC1	armadillo repeat containing 1	5	55156
GC08M142287_at	SLC45A4	solute carrier family 45, member 4	5	57210
GC08M145608_at	SLC39A4	solute carrier family 39 (zinc transporter), member 4	5	55630
GC08M145723_at	C8orf82	chromosome 8 open reading frame 82	5	414919
GC08P000346_at	FBXO25	F-box protein 25	5	26260
GC08P017824_at	PCM1	pericentriolar material 1	5	5108
GC08P038208_at	DDHD2	DDHD domain containing 2	5	23259
GC08P095802_at	DPY19L4	dpy-19-like 4 (C. elegans)	5	286148
GC08P124155_at	WDR67	WD repeat domain 67	5	93594
GC08P145209_at	GPAA1	glycosylphosphatidylinositol anchor attachment protein 1 homolog (yeast)	5	8733
GC09M005756_at	ERMP1	endoplasmic reticulum metallopeptidase 1	5	79956
GC09M015456_at	PSIP1	PC4 and SFRS1 interacting protein 1	5	11168
GC09M032543_at	NDUFB6	NADH dehydrogenase (ubiquinone) 1 beta subcomplex, 6, 17kDa	5	4712
GC09M034078_at	WDR40A	WD repeat domain 40A	5	25853
GC09M034625_at	SIGMAR1	sigma non-opioid intracellular receptor 1	5	10280
GC09M093015_at	AUH	AU RNA binding protein/enoyl-Coenzyme A hydratase	5	549
GC09M110669_at	IKBKAP	inhibitor of kappa light polypeptide gene enhancer in B-cells, kinase complex-associated protein	5	8518
GC09M110817_at	C9orf5	chromosome 9 open reading frame 5	5	23731
GC09M115188_at	ALAD	aminolevulinate, delta-, dehydratase	5	210
GC09M126680_at	GOLGA1	golgi autoantigen, golgin subfamily a, 1	5	2800
GC09P005577_at	KIAA1432	KIAA1432	5	57589
GC09P020651_at	KIAA1797	KIAA1797	5	54914
GC09P034319_at	NUDT2	nudix (nucleoside diphosphate linked moiety X)-type motif 2	5	318
GC09P085427_at	C9orf103	chromosome 9 open reading frame 103	5	414328
GC09P114182_at	HSDL2	hydroxysteroid dehydrogenase like 2	5	84263
GC09P132579_at	ABL1	c-abl oncogene 1, receptor tyrosine kinase	5	25
GC09P133369_at	POMT1	protein-O-mannosyltransferase 1	5	10585
GC09P135884_at	NCRNA00094	non-protein coding RNA 94	5	266655
GC09P138862_at	PHPT1	phosphohistidine phosphatase 1	5	29085
GC09P139101_at	MAN1B1	mannosidase, alpha, class 1B, member 1	5	11253
GC09P139565_at	MRPL41	mitochondrial ribosomal protein L41	5	64975
GC0XM016516_at	CTPS2	CTP synthase II	5	56474
GC0XM070376_at	ZMYM3	zinc finger, MYM-type 3	5	9203
GC0XM129092_at	AIFM1	apoptosis-inducing factor, mitochondrion-associated, 1	5	9131
GC0XM153556_at	GAB3	GRB2-associated binding protein 3	5	139716
GC0XP012719_at	PRPS2	phosphoribosyl pyrophosphate synthetase 2	5	5634
GC0XP024622_at	POLA1	polymerase (DNA directed), alpha 1, catalytic subunit	5	5422
GC0XP055495_at	MAGEH1	melanoma antigen family H, 1	5	28986
GC0XP102690_at	TCEAL1	transcription elongation factor A (SII)-like 1	5	9338
GC0XP134895_at	SLC9A6	solute carrier family 9 (sodium/hydrogen exchanger), member 6	5	10479
GC0XP153952_at	BRCC3	BRCA1/BRCA2-containing complex, subunit 3	5	79184
GC10M057787_at	ZWINT	ZW10 interactor	5	11130
GC10M097941_at	BLNK	B-cell linker	5	29760
GC10M098971_at	ARHGAP19	Rho GTPase activating protein 19	5	84986
GC10M099082_at	FRAT2	frequently rearranged in advanced T-cell lymphomas 2	5	23401
GC10M104423_at	ARL3	ADP-ribosylation factor-like 3	5	403
GC10M120917_at	PRDX3	peroxiredoxin 3	5	10935
GC10P074540_at	NUDT13	nudix (nucleoside diphosphate linked moiety X)-type motif 13	5	25961
GC10P094599_at	EXOC6	exocyst complex component 6	5	54536
GC10P102746_at	LZTS2	leucine zipper, putative tumor suppressor 2	5	84445
GC10P104212_at	TMEM180	transmembrane protein 180	5	79847
GC10P104525_at	C10orf26	chromosome 10 open reading frame 26	5	54838
GC11M046722_at	CKAP5	cytoskeleton associated protein 5	5	9793
GC11M047595_at	MTCH2	mitochondrial carrier homolog 2 (C. elegans)	5	23788
GC11M062214_at	BSCL2	Bernardinelli-Seip congenital lipodystrophy 2 (seipin)	5	26580
GC11M063154_at	ATL3	atlastin GTPase 3	5	25923
GC11M063793_at	BAD	BCL2-associated agonist of cell death	5	572
GC11M066962_at	CORO1B	coronin, actin binding protein, 1B	5	57175
GC11M073363_at	UCP2	uncoupling protein 2 (mitochondrial, proton carrier)	5	7351
GC11M077457_at	NDUFC2	NADH dehydrogenase (ubiquinone) 1, subcomplex unknown, 2, 14.5kDa	5	4718
GC11M077489_at	ALG8	asparagine-linked glycosylation 8, alpha-1,3-glucosyltransferase homolog (S. cerevisiae)	5	79053
GC11M093790_at	MRE11A	MRE11 meiotic recombination 11 homolog A (S. cerevisiae)	5	4361
GC11M105427_at	KBTBD3	kelch repeat and BTB (POZ) domain containing 3	5	143879
GC11M106879_at	ALKBH8	alkB, alkylation repair homolog 8 (E. coli)	5	91801
GC11M111162_at	ALG9	asparagine-linked glycosylation 9, alpha-1,2-mannosyltransferase homolog (S. cerevisiae)	5	79796
GC11M133624_at	THYN1	thymocyte nuclear protein 1	5	29087
GC11P002877_at	SLC22A18	solute carrier family 22, member 18	5	5002
GC11P004072_at	RRM1	ribonucleotide reductase M1	5	6240
GC11P008889_at	C11orf17	chromosome 11 open reading frame 17	5	56672
GC11P018372_at	LDHA	lactate dehydrogenase A	5	3939
GC11P031487_at	ELP4	elongation protein 4 homolog (S. cerevisiae)	5	26610
GC11P043859_at	ALKBH3	alkB, alkylation repair homolog 3 (E. coli)	5	221120
GC11P046915_at	C11orf49	chromosome 11 open reading frame 49	5	79096
GC11P047544_at	NDUFS3	NADH dehydrogenase (ubiquinone) Fe-S protein 3, 30kDa (NADH-coenzyme Q reductase)	5	4722
GC11P061861_at	ASRGL1	asparaginase like 1	5	80150
GC11P063464_at	NAT11	N-acetyltransferase 11 (GCN5-related, putative)	5	79829
GC11P064566_at	SAC3D1	SAC3 domain containing 1	5	29901
GC11P073267_at	PAAF1	proteasomal ATPase-associated factor 1	5	80227
GC11P077210_at	C11orf67	chromosome 11 open reading frame 67	5	28971
GC11P124048_at	SPA17	sperm autoantigenic protein 17	5	53340
GC11P125645_at	FOXRED1	FAD-dependent oxidoreductase domain containing 1	5	55572
GC11P133600_at	VPS26B	vacuolar protein sorting 26 homolog B (S. pombe)	5	112936
GC12M006521_at	IFFO1	intermediate filament family orphan 1	5	25900
GC12M006958_at	LPCAT3	lysophosphatidylcholine acyltransferase 3	5	10162
GC12M027017_at	TM7SF3	transmembrane 7 superfamily member 3	5	51768
GC12M030754_at	CAPRIN2	caprin family member 2	5	65981
GC12M055097_at	TIMELESS	timeless homolog (Drosophila)	5	8914
GC12M055411_at	PRIM1	primase, DNA, polypeptide 1 (49kDa)	5	5557
GC12M056499_at	CTDSP2	CTD (carboxy-terminal domain, RNA polymerase II, polypeptide A) small phosphatase 2	5	10106
GC12M086966_at	CEP290	centrosomal protein 290kDa	5	80184
GC12M093976_at	FGD6	FYVE, RhoGEF and PH domain containing 6	5	55785
GC12M094897_at	LTA4H	leukotriene A4 hydrolase	5	4048
GC12M097512_at	IKIP	IKK interacting protein	5	121457
GC12M100910_at	CCDC53	coiled-coil domain containing 53	5	51019
GC12M100972_at	NUP37	nucleoporin 37kDa	5	79023
GC12M109570_at	HVCN1	hydrogen voltage-gated channel 1	5	84329
GC12P006473_at	NCAPD2	non-SMC condensin I complex, subunit D2	5	9918
GC12P014818_at	H2AFJ	H2A histone family, member J	5	55766
GC12P015956_at	DERA	2-deoxyribose-5-phosphate aldolase homolog (C. elegans)	5	51071
GC12P036998_at	ALG10B	asparagine-linked glycosylation 10, alpha-1,2-glucosyltransferase homolog B (yeast)	5	144245
GC12P054677_at	SUOX	sulfite oxidase	5	6821
GC12P054836_at	MYL6B	myosin, light chain 6B, alkali, smooth muscle and non-muscle	5	140465
GC12P054905_at	OBFC2B	oligonucleotide/oligosaccharide-binding fold containing 2B	5	79035
GC12P066328_at	DYRK2	dual-specificity tyrosine-(Y)-phosphorylation regulated kinase 2	5	8445
GC12P070368_at	TMEM19	transmembrane protein 19	5	55266
GC12P107459_at	ISCU	iron-sulfur cluster scaffold homolog (E. coli)	5	23479
GC12P112087_at	C12orf52	chromosome 12 open reading frame 52	5	84934
GC12P116917_at	RFC5	replication factor C (activator 1) 5, 36.5kDa	5	5985
GC12P122025_at	OGFOD2	2-oxoglutarate and iron-dependent oxygenase domain containing 2	5	79676
GC13M023202_at	MIPEP	mitochondrial intermediate peptidase	5	4285
GC13M028173_at	SLC46A3	solute carrier family 46, member 3	5	283537
GC13M036421_at	ALG5	asparagine-linked glycosylation 5, dolichyl-phosphate beta-glucosyltransferase homolog (S. cerevisiae)	5	29880
GC13M051604_at	NEK3	NIMA (never in mitosis gene a)-related kinase 3	5	4752
GC13P020648_at	MRP63	mitochondrial ribosomal protein 63	5	78988
GC13P038512_at	NHLRC3	NHL repeat containing 3	5	387921
GC13P041744_at	AKAP11	A kinase (PRKA) anchor protein 11	5	11215
GC13P044461_at	KIAA1704	KIAA1704	5	55425
GC13P094053_at	GPR180	G protein-coupled receptor 180	5	160897
GC13P096884_at	RAP2A	RAP2A, member of RAS oncogene family	5	5911
GC13P114065_at	UPF3A	UPF3 regulator of nonsense transcripts homolog A (yeast)	5	65110
GC14M019827_at	TTC5	tetratricopeptide repeat domain 5	5	91875
GC14M067187_at	VTI1B	vesicle transport through interaction with t-SNAREs homolog 1B (yeast)	5	10490
GC14M073597_at	ALDH6A1	aldehyde dehydrogenase 6 family, member A1	5	4329
GC14M074668_at	TMED10	transmembrane emp24-like trafficking protein 10 (yeast)	5	10972
GC14M076872_at	TMED8	transmembrane emp24 protein transport domain containing 8	5	283578
GC14M087469_at	GALC	galactosylceramidase	5	2581
GC14M095817_at	ATG2B	ATG2 autophagy related 2 homolog B (S. cerevisiae)	5	55102
GC14P019881_at	PARP2	poly (ADP-ribose) polymerase 2	5	10038
GC14P034661_at	KIAA0391	KIAA0391	5	9692
GC14P035365_at	BRMS1L	breast cancer metastasis-suppressor 1-like	5	84312
GC14P044675_at	FANCM	Fanconi anemia, complementation group M	5	57697
GC14P057963_at	KIAA0586	KIAA0586	5	9786
GC14P066043_at	GPHN	gephyrin	5	10243
GC14P073183_at	DNAL1	dynein, axonemal, light chain 1	5	83544
GC14P076857_at	GSTZ1	glutathione transferase zeta 1	5	2954
GC14P087541_at	GPR65	G protein-coupled receptor 65	5	8477
GC14P088360_at	TTC8	tetratricopeptide repeat domain 8	5	123016
GC15M026029_at	HERC2	hect domain and RLD 2	5	8924
GC15M040238_at	VPS39	vacuolar protein sorting 39 homolog (S. cerevisiae)	5	23339
GC15M040803_at	CDAN1	congenital dyserythropoietic anemia, type I	5	146059
GC15M046818_at	CEP152	centrosomal protein 152kDa	5	22995
GC15M062152_at	FAM96A	family with sequence similarity 96, member A	5	84191
GC15M063526_at	DPP8	dipeptidyl-peptidase 8	5	54878
GC15M072924_at	SCAMP2	secretory carrier membrane protein 2	5	10066
GC15M074295_at	ETFA	electron-transfer-flavoprotein, alpha polypeptide	5	2108
GC15M088428_at	IDH2	isocitrate dehydrogenase 2 (NADP+), mitochondrial	5	3418
GC15M089276_at	HDDC3	HD domain containing 3	5	374659
GC15M089342_at	VPS33B	vacuolar protein sorting 33 homolog B (yeast)	5	26276
GC15P028984_at	MTMR15	myotubularin related protein 15	5	22909
GC15P038462_at	C15orf23	chromosome 15 open reading frame 23	5	90417
GC15P038886_at	ZFYVE19	zinc finger, FYVE domain containing 19	5	84936
GC15P041214_at	TMEM62	transmembrane protein 62	5	80021
GC15P063610_at	PTPLAD1	protein tyrosine phosphatase-like A domain containing 1	5	51495
GC15P067240_at	GLCE	glucuronic acid epimerase	5	26035
GC15P072540_at	LOC440288	similar to FLJ16518 protein	5	440288
GC15P075074_at	PSTPIP1	proline-serine-threonine phosphatase interacting protein 1	5	9051
GC15P087588_at	FANCI	Fanconi anemia, complementation group I	5	55215
GC15P097609_at	LRRC28	leucine rich repeat containing 28	5	123355
GC16M001799_at	HAGH	hydroxyacylglutathione hydrolase	5	3029
GC16M002201_at	PGP	phosphoglycolate phosphatase	5	283871
GC16M003012_at	HCFC1R1	host cell factor C1 regulator 1 (XPO1 dependent)	5	54985
GC16M004452_at	NMRAL1	NmrA-like family domain containing 1	5	57407
GC16M014437_at	PARN	poly(A)-specific ribonuclease (deadenylation nuclease)	5	5073
GC16M015039_at	NTAN1	N-terminal asparagine amidase	5	123803
GC16M019422_at	GDE1	glycerophosphodiester phosphodiesterase 1	5	51573
GC16M029911_at	HIRIP3	HIRA interacting protein 3	5	8479
GC16M030011_at	YPEL3	yippee-like 3 (Drosophila)	5	83719
GC16M045747_at	ITFG1	integrin alpha FG-GAP repeat containing 1	5	81533
GC16M052082_at	AKTIP	AKT interacting protein	5	64400
GC16M055075_at	BBS2	Bardet-Biedl syndrome 2	5	583
GC16M065395_at	NAE1	NEDD8 activating enzyme E1 subunit 1	5	8883
GC16M073044_at	GLG1	golgi apparatus protein 1	5	2734
GC16P000632_at	C16orf14	chromosome 16 open reading frame 14	5	84331
GC16P002487_at	TBC1D24	TBC1 domain family, member 24	5	57465
GC16P002503_at	ATP6V0C	ATPase, H+ transporting, lysosomal 16kDa, V0 subunit c	5	527
GC16P003391_at	ZNF174	zinc finger protein 174	5	7727
GC16P019636_at	IQCK	IQ motif containing K	5	124152
GC16P025030_at	LCMT1	leucine carboxyl methyltransferase 1	5	51451
GC16P030869_at	ORAI3	ORAI calcium release-activated calcium modulator 3	5	93129
GC16P052025_at	RBL2	retinoblastoma-like 2 (p130)	5	5934
GC16P056328_at	KATNB1	katanin p80 (WD repeat containing) subunit B 1	5	10300
GC16P056985_at	GINS3	GINS complex subunit 3 (Psf3 homolog)	5	64785
GC16P066837_at	PLA2G15	phospholipase A2, group XV	5	23659
GC16P076316_at	NUDT7	nudix (nucleoside diphosphate linked moiety X)-type motif 7	5	283927
GC17M003512_at	TAX1BP3	Tax1 (human T-cell leukemia virus type I) binding protein 3	5	30851
GC17M004782_at	SLC25A11	solute carrier family 25 (mitochondrial carrier; oxoglutarate carrier), member 11	5	8402
GC17M011821_at	ZNF18	zinc finger protein 18	5	7566
GC17M023924_at	ALDOC	aldolase C, fructose-bisphosphate	5	230
GC17M024065_at	RAB34	RAB34, member RAS oncogene family	5	83871
GC17M024912_at	ABHD15	abhydrolase domain containing 15	5	116236
GC17M027683_at	C17orf75	chromosome 17 open reading frame 75	5	64149
GC17M050384_at	COX11	COX11 homolog, cytochrome c oxidase assembly protein (yeast)	5	1353
GC17M059134_at	STRADA	STE20-related kinase adaptor alpha	5	92335
GC17M068153_at	SLC39A11	solute carrier family 39 (metal ion transporter), member 11	5	201266
GC17M070204_at	CD300LF	CD300 molecule-like family member f	5	146722
GC17M070370_at	FDXR	ferredoxin reductase	5	2232
GC17M074363_at	TIMP2	TIMP metallopeptidase inhibitor 2	5	7077
GC17M077569_at	STRA13	stimulated by retinoic acid 13 homolog (mouse)	5	201254
GC17M077599_at	RFNG	RFNG O-fucosylpeptide 3-beta-N-acetylglucosaminyltransferase	5	5986
GC17P001680_at	RPA1	replication protein A1, 70kDa	5	6117
GC17P008133_at	RANGRF	RAN guanine nucleotide release factor	5	29098
GC17P017883_at	C17orf39	chromosome 17 open reading frame 39	5	79018
GC17P026272_at	ADAP2	ArfGAP with dual PH domains 2	5	55803
GC17P026322_at	RNF135	ring finger protein 135	5	84282
GC17P037941_at	NAGLU	N-acetylglucosaminidase, alpha-	5	4669
GC17P039503_at	G6PC3	glucose 6 phosphatase, catalytic, 3	5	92579
GC17P039778_at	GRN	granulin	5	2896
GC17P045859_at	ACSF2	acyl-CoA synthetase family member 2	5	80221
GC17P059032_at	CCDC44	coiled-coil domain containing 44	5	51204
GC17P059877_at	C17orf60	chromosome 17 open reading frame 60	5	284021
GC17P069975_at	CD300A	CD300a molecule	5	11314
GC17P070716_at	NUP85	nucleoporin 85kDa	5	79902
GC17P070769_at	MRPS7	mitochondrial ribosomal protein S7	5	51081
GC17P070964_at	KIAA0195	KIAA0195	5	9772
GC17P073676_at	SYNGR2	synaptogyrin 2	5	9144
GC17P075689_at	GAA	glucosidase, alpha; acid	5	2548
GC17P078009_at	NARF	nuclear prelamin A recognition factor	5	26502
GC18M005279_at	ZFP161	zinc finger protein 161 homolog (mouse)	5	7541
GC18M019996_at	OSBPL1A	oxysterol binding protein-like 1A	5	114876
GC18M026900_at	DSC2	desmocollin 2	5	1824
GC18M032630_at	C18orf10	chromosome 18 open reading frame 10	5	25941
GC18M042935_at	IER3IP1	immediate early response 3 interacting protein 1	5	51124
GC18M053367_at	FECH	ferrochelatase (protoporphyria)	5	2235
GC18M055148_at	LMAN1	lectin, mannose-binding, 1	5	3998
GC18M057862_at	PIGN	phosphatidylinositol glycan anchor biosynthesis, class N	5	23556
GC18P041940_at	HAUS1	HAUS augmin-like complex, subunit 1	5	115106
GC19M011316_at	TMEM205	transmembrane protein 205	5	374882
GC19M011700_at	ZNF823	zinc finger protein 823	5	55552
GC19M013070_at	LYL1	lymphoblastic leukemia derived sequence 1	5	4066
GC19M014091_at	ASF1B	ASF1 anti-silencing function 1 homolog B (S. cerevisiae)	5	55723
GC19M014450_at	GIPC1	GIPC PDZ domain containing family, member 1	5	10755
GC19M038569_at	PEPD	peptidase D	5	5184
GC19M040927_at	TMEM149	transmembrane protein 149	5	79713
GC19M041192_at	ALKBH6	alkB, alkylation repair homolog 6 (E. coli)	5	84964
GC19M042593_at	ZNF569	zinc finger protein 569	5	148266
GC19M043997_at	ECH1	enoyl Coenzyme A hydratase 1, peroxisomal	5	1891
GC19M045645_at	BLVRB	biliverdin reductase B (flavin reductase (NADPH))	5	645
GC19M052033_at	AP2S1	adaptor-related protein complex 2, sigma 1 subunit	5	1175
GC19M054830_at	RRAS	related RAS viral (r-ras) oncogene homolog	5	6237
GC19M056540_at	ETFB	electron-transfer-flavoprotein, beta polypeptide	5	2109
GC19M056608_at	SIGLEC10	sialic acid binding Ig-like lectin 10	5	89790
GC19P003045_at	GNA11	guanine nucleotide binding protein (G protein), alpha 11 (Gq class)	5	2767
GC19P003523_at	HMG20B	high-mobility group 20B	5	10362
GC19P008391_at	1998-02-28	membrane-associated ring finger (C3HC4) 2	5	51257
GC19P012778_at	RNASEH2A	ribonuclease H2, subunit A	5	10535
GC19P017240_at	C19orf62	chromosome 19 open reading frame 62	5	29086
GC19P017309_at	GTPBP3	GTP binding protein 3 (mitochondrial)	5	84705
GC19P017528_at	GLT25D1	glycosyltransferase 25 domain containing 1	5	79709
GC19P018167_at	MPV17L2	MPV17 mitochondrial membrane protein-like 2	5	84769
GC19P045557_at	PLD3	phospholipase D family, member 3	5	23646
GC19P051799_at	CALM3	calmodulin 3 (phosphorylase kinase, delta)	5	808
GC19P054860_at	BCL2L12	BCL2-like 12 (proline rich)	5	83596
GC19P055582_at	POLD1	polymerase (DNA directed), delta 1, catalytic subunit 125kDa	5	5424
GC20M001372_at	NSFL1C	NSFL1 (p97) cofactor (p47)	5	55968
GC20M005028_at	C20orf30	chromosome 20 open reading frame 30	5	29058
GC20M024891_at	C20orf3	chromosome 20 open reading frame 3	5	57136
GC20M034815_at	DSN1	DSN1, MIND kinetochore complex component, homolog (S. cerevisiae)	5	79980
GC20M054377_at	AURKA	aurora kinase A	5	6790
GC20M060397_at	CABLES2	Cdk5 and Abl enzyme substrate 2	5	81928
GC20P017897_at	C20orf72	chromosome 20 open reading frame 72	5	92667
GC20P018066_at	CSRP2BP	CSRP2 binding protein	5	57325
GC20P035240_at	RPN2	ribophorin II	5	6185
GC20P043953_at	CTSA	cathepsin A	5	5476
GC21M026018_at	ATP5J	ATP synthase, H+ transporting, mitochondrial F0 complex, subunit F6	5	522
GC21M033882_at	CRYZL1	crystallin, zeta (quinone reductase)-like 1	5	9946
GC21M039468_at	PSMG1	proteasome (prosome, macropain) assembly chaperone 1	5	8624
GC21M045049_at	SUMO3	SMT3 suppressor of mif two 3 homolog 3 (S. cerevisiae)	5	6612
GC21P036459_at	DOPEY2	dopey family member 2	5	9980
GC22M043912_at	C22orf9	chromosome 22 open reading frame 9	5	23313
GC22P017793_at	MRPL40	mitochondrial ribosomal protein L40	5	64976
GC22P029153_at	MTP18	mitochondrial protein 18 kDa	5	51537
GC01M009121_at	GPR157	G protein-coupled receptor 157	6	80045
GC01M017185_at	ATP13A2	ATPase type 13A2	6	23400
GC01M023558_at	ZNF436	zinc finger protein 436	6	80818
GC01M024001_at	HMGCL	3-hydroxymethyl-3-methylglutaryl-Coenzyme A lyase	6	3155
GC01M026158_at	PAFAH2	platelet-activating factor acetylhydrolase 2, 40kDa	6	5051
GC01M035815_at	PSMB2	proteasome (prosome, macropain) subunit, beta type, 2	6	5690
GC01M040858_at	RIMS3	regulating synaptic membrane exocytosis 3	6	9783
GC01M045240_at	HECTD3	HECT domain containing 3	6	79654
GC01M045891_at	IPP	intracisternal A particle-promoted polypeptide	6	3652
GC01M046795_at	MKNK1	MAP kinase interacting serine/threonine kinase 1	6	8569
GC01M053423_at	LRP8	low density lipoprotein receptor-related protein 8, apolipoprotein e receptor	6	7804
GC01M054935_at	PARS2	prolyl-tRNA synthetase 2, mitochondrial (putative)	6	25973
GC01M055027_at	DHCR24	24-dehydrocholesterol reductase	6	1718
GC01M056671_at	PPAP2B	phosphatidic acid phosphatase type 2B	6	8613
GC01M074883_at	CRYZ	crystallin, zeta (quinone reductase)	6	1429
GC01M084048_at	TTLL7	tubulin tyrosine ligase-like family, member 7	6	79739
GC01M086527_at	ODF2L	outer dense fiber of sperm tails 2-like	6	57489
GC01M100263_at	SASS6	spindle assembly 6 homolog (C. elegans)	6	163786
GC01M100371_at	DBT	dihydrolipoamide branched chain transacylase E2	6	1629
GC01M108389_at	SLC25A24	solute carrier family 25 (mitochondrial carrier; phosphate carrier), member 24	6	29957
GC01M109185_at	CLCC1	chloride channel CLIC-like 1	6	23155
GC01M109656_at	PSMA5	proteasome (prosome, macropain) subunit, alpha type, 5	6	5686
GC01M111442_at	DENND2D	DENN/MADD domain containing 2D	6	79961
GC01M149415_at	VPS72	vacuolar protein sorting 72 homolog (S. cerevisiae)	6	6944
GC01M150271_at	S100A11	S100 calcium binding protein A11	6	6282
GC01M152198_at	SLC39A1	solute carrier family 39 (zinc transporter), member 1	6	27173
GC01M153494_at	SCAMP3	secretory carrier membrane protein 3	6	10067
GC01M154531_at	C1orf85	chromosome 1 open reading frame 85	6	112770
GC01M157298_at	AIM2	absent in melanoma 2	6	9447
GC01M158261_at	PIGM	phosphatidylinositol glycan anchor biosynthesis, class M	6	93183
GC01M159458_at	APOA2	apolipoprotein A-II	6	336
GC01M163962_at	TMCO1	transmembrane and coiled-coil domains 1	6	54499
GC01M167368_at	NME7	non-metastatic cells 7, protein expressed in (nucleoside-diphosphate kinase)	6	29922
GC01M168028_at	C1orf156	chromosome 1 open reading frame 156	6	92342
GC01M168088_at	SCYL3	SCY1-like 3 (S. cerevisiae)	6	57147
GC01M168157_at	KIFAP3	kinesin-associated protein 3	6	22920
GC01M180809_at	RNASEL	ribonuclease L (2',5'-oligoisoadenylate synthetase-dependent)	6	6041
GC01M183353_at	C1orf25	chromosome 1 open reading frame 25	6	81627
GC01M201414_at	CHI3L1	chitinase 3-like 1 (cartilage glycoprotein-39)	6	1116
GC01M204003_at	RAB7L1	RAB7, member RAS oncogene family-like 1	6	8934
GC01M210605_at	TMEM206	transmembrane protein 206	6	55248
GC01M218388_at	RAB3GAP2	RAB3 GTPase activating protein subunit 2 (non-catalytic)	6	25782
GC01M219941_at	DUSP10	dual specificity phosphatase 10	6	11221
GC01M227643_at	NUP133	nucleoporin 133kDa	6	55746
GC01M229429_at	C1orf131	chromosome 1 open reading frame 131	6	128061
GC01M235234_at	MT1P2	metallothionein 1 pseudogene 2	6	645745
GC01P009938_at	NMNAT1	nicotinamide nucleotide adenylyltransferase 1	6	64802
GC01P010027_at	UBE4B	ubiquitination factor E4B (UFD2 homolog, yeast)	6	10277
GC01P010469_at	PEX14	peroxisomal biogenesis factor 14	6	5195
GC01P011658_at	FBXO6	F-box protein 6	6	26270
GC01P013782_at	PDPN	podoplanin	6	10630
GC01P015352_at	TMEM51	transmembrane protein 51	6	55092
GC01P017738_at	ARHGEF10L	Rho guanine nucleotide exchange factor (GEF) 10-like	6	55160
GC01P025536_at	TMEM50A	transmembrane protein 50A	6	23585
GC01P026631_at	DHDDS	dehydrodolichyl diphosphate synthase	6	79947
GC01P028753_at	TRNAU1AP	tRNA selenocysteine 1 associated protein 1	6	54952
GC01P039319_at	MACF1	microtubule-actin crosslinking factor 1	6	23499
GC01P040496_at	ZMPSTE24	zinc metallopeptidase (STE24 homolog, S. cerevisiae)	6	10269
GC01P044213_at	ATP6V0B	ATPase, H+ transporting, lysosomal 21kDa, V0 subunit b	6	533
GC01P045789_at	AKR1A1	aldo-keto reductase family 1, member A1 (aldehyde reductase)	6	10327
GC01P053374_at	CPT2	carnitine palmitoyltransferase 2	6	1376
GC01P059535_at	FGGY	FGGY carbohydrate kinase domain containing	6	55277
GC01P062962_at	ATG4C	ATG4 autophagy related 4 homolog C (S. cerevisiae)	6	84938
GC01P063761_at	EFCAB7	EF-hand calcium binding domain 7	6	84455
GC01P065659_at	LEPR	leptin receptor	6	3953
GC01P074375_at	FPGT	fucose-1-phosphate guanylyltransferase	6	8790
GC01P086882_at	SH3GLB1	SH3-domain GRB2-like endophilin B1	6	51100
GC01P087092_at	HS2ST1	heparan sulfate 2-O-sulfotransferase 1	6	9653
GC01P100504_at	RTCD1	RNA terminal phosphate cyclase domain 1	6	8634
GC01P109749_at	CYB561D1	cytochrome b-561 domain containing 1	6	284613
GC01P111482_at	CHI3L2	chitinase 3-like 2	6	1117
GC01P113018_at	MOV10	Mov10, Moloney leukemia virus 10, homolog (mouse)	6	4343
GC01P114249_at	DCLRE1B	DNA cross-link repair 1B (PSO2 homolog, S. cerevisiae)	6	64858
GC01P148020_at	FCGR1A	Fc fragment of IgG, high affinity Ia, receptor (CD64)	6	2209
GC01P149247_at	PRUNE	prune homolog (Drosophila)	6	58497
GC01P158063_at	SLAMF8	SLAM family member 8	6	56833
GC01P159451_at	FCER1G	Fc fragment of IgE, high affinity I, receptor for; gamma polypeptide	6	2207
GC01P159958_at	FCRLB	Fc receptor-like B	6	127943
GC01P168768_at	GORAB	golgin, RAB6-interacting	6	92344
GC01P170018_at	METTL13	methyltransferase like 13	6	51603
GC01P179269_at	MR1	major histocompatibility complex, class I-related	6	3140
GC01P199859_at	NAV1	neuron navigator 1	6	89796
GC01P207926_at	HSD11B1	hydroxysteroid (11-beta) dehydrogenase 1	6	3290
GC01P221112_at	DISP1	dispatched homolog 1 (Drosophila)	6	84976
GC01P222611_at	CNIH4	cornichon homolog 4 (Drosophila)	6	29097
GC01P225124_at	PSEN2	presenilin 2 (Alzheimer disease 4)	6	5664
GC01P228269_at	GALNT2	UDP-N-acetyl-alpha-D-galactosamine:polypeptide N-acetylgalactosaminyltransferase 2 (GalNAc-T2)	6	2590
GC01P229181_at	ARV1	ARV1 homolog (S. cerevisiae)	6	64801
GC01P233663_at	TBCE	tubulin folding cofactor E	6	6905
GC02M010875_at	PDIA6	protein disulfide isomerase family A, member 6	6	10130
GC02M017708_at	SMC6	structural maintenance of chromosomes 6	6	79677
GC02M020747_at	C2orf43	chromosome 2 open reading frame 43	6	60526
GC02M024105_at	C2orf44	chromosome 2 open reading frame 44	6	80304
GC02M027207_at	PREB	prolactin regulatory element binding	6	10113
GC02M032303_at	NLRC4	NLR family, CARD domain containing 4	6	58484
GC02M044458_at	PREPL	prolyl endopeptidase-like	6	9581
GC02M046720_at	PIGF	phosphatidylinositol glycan anchor biosynthesis, class F	6	5281
GC02M068373_at	CNRIP1	cannabinoid receptor interacting protein 1	6	25927
GC02M069464_at	GFPT1	glutamine-fructose-6-phosphate transaminase 1	6	2673
GC02M074555_at	CCDC142	coiled-coil domain containing 142	6	84865
[truncated: 1,997 more rows]
